# Supplementary material for: Potential for and Distribution of Enzymatic Biodegradation of Polystyrene by Environmental Microorganisms
Source: PubMed Central journal article supplement (PMC7864516; doi:10.3390/ma14030503), 2021-01-21
Supplement: materials-14-00503-s001.pdf [file materials-14-00503-s001.pdf]

# Potential for and Distribution of Enzymatic Biodegradation of Polystyrene by Environmental Microorganisms

Liyuan Hou and Erica L.-W. Majumder

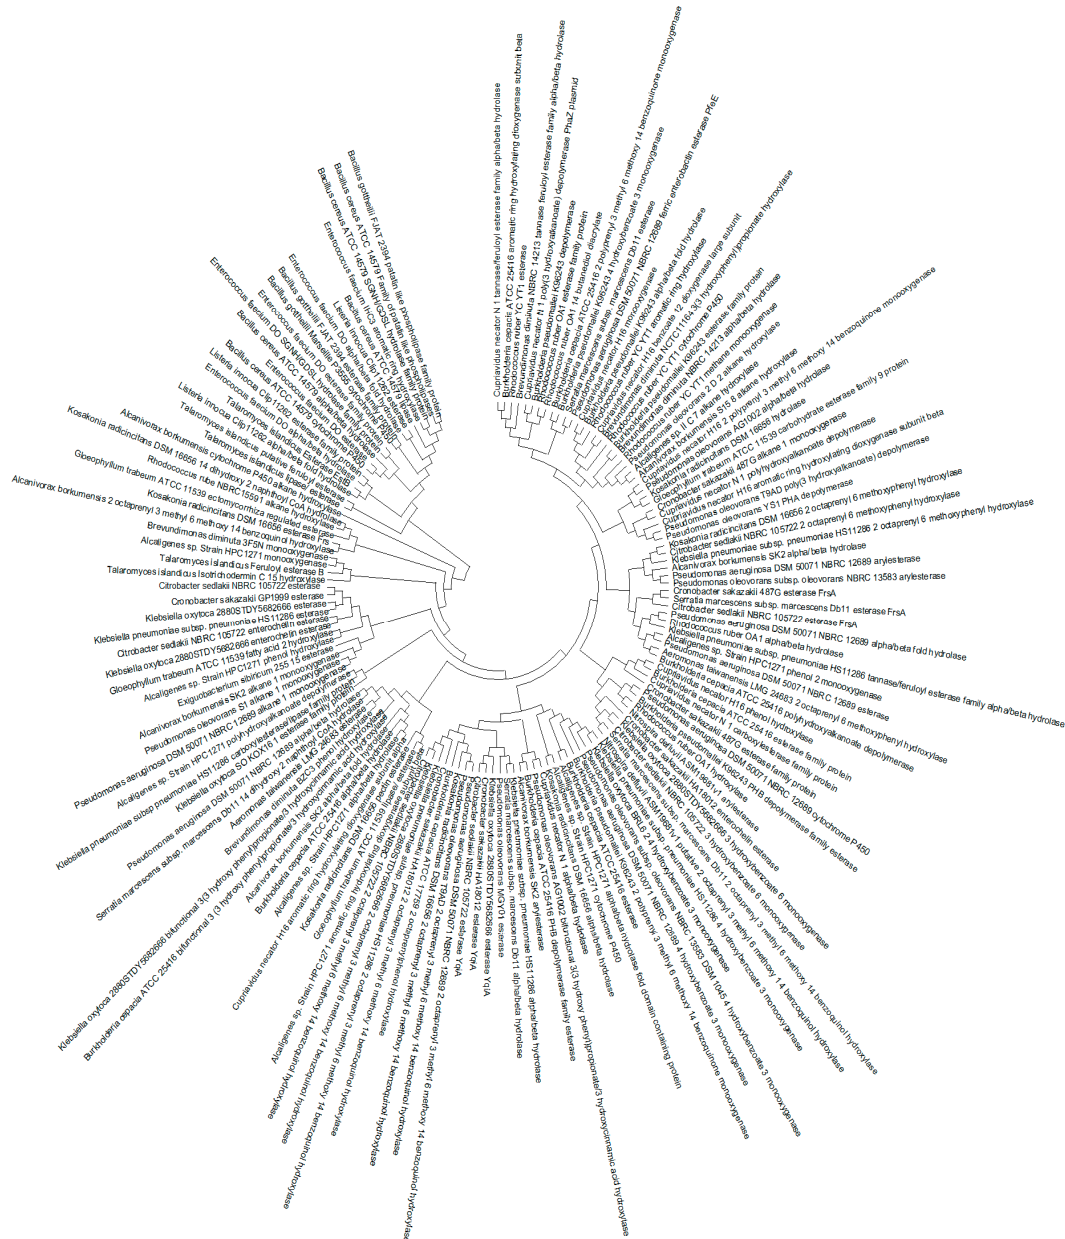

**Figure S1.** Phylogenetic tree of DNA sequences of all subclass enzymes from target microorganisms listed in Table 2 including cytochrome P450, monooxygenase, aromatic ring hydroxylase, esterase, and alpha/beta hydrolase.

**Table S1.** Potential PS degrading microorganisms and representative enzymes listed in the literature.

| Kingdom                       | Species                                                       | Representative Potential Enzymes                                                                                                                                                                                 |
|-------------------------------|---------------------------------------------------------------|------------------------------------------------------------------------------------------------------------------------------------------------------------------------------------------------------------------|
| Bacteria                      | <i>Bacillus cereus</i> ATCC 14579                             | Alpha/beta hydrolase, SGNH/GDSL hydrolase family protein, cytochrome P450                                                                                                                                        |
|                               | <i>Cytobacillus gottheilii</i> ASM163634v1                    | Esterase family protein, cytochrome P450                                                                                                                                                                         |
|                               | <i>Enterococcus faecium</i> DO                                | Alpha/beta hydrolase, SGNH/GDSL hydrolase family protein, aromatic ring hydroxylase, esterase family protein                                                                                                     |
|                               | <i>Listeria innocua</i> Clip11262                             | Esterase family protein, alpha/beta fold hydrolase                                                                                                                                                               |
|                               | <i>Exiguobacterium sibiricum</i> 255-15                       | Esterase                                                                                                                                                                                                         |
|                               | <i>Cupriavidus necator</i> N-1                                | Alpha/beta hydrolase, carboxylesterase family protein, polyhydroxyalkanoate depolymerase, phenol hydroxylase, monooxygenase, aromatic ring-hydroxylating dioxygenase subunit alpha                               |
|                               | <i>Burkholderia cepacia</i> ATCC 25416                        | Esterase family protein, alpha/beta fold hydrolase, polyhydroxyalkanoate depolymerase, PHB depolymerase family esterase, 2-polyprenyl-3-methyl-6-methoxy-1,4-benzoquinone monooxygenase                          |
|                               | <i>Burkholderia pseudomallei</i> K96243                       | PHB depolymerase family esterase, depolymerase, alpha/beta hydrolase, 2-polyprenyl-3-methyl-6-methoxy-1,4-benzoquinone monooxygenase                                                                             |
|                               | <i>Klebsiella pneumoniae</i> subsp. <i>pneumoniae</i> HS11286 | Alpha/beta hydrolase, carboxylesterase/lipase family protein, 2-octaprenyl-3-methyl-6-methoxy-1,4-benzoquinol hydroxylase, 4-hydroxybenzoate 3-monooxygenase, 2-octaprenyl-6-methoxyphenyl hydroxylase           |
|                               | <i>Kosakonia radicincitans</i> DSM 16656                      | Hydrolase, alpha/beta hydrolase, 2-octaprenyl-6-methoxyphenyl hydroxylase, 2-octaprenyl-3-methyl-6-methoxy-1,4-benzoquinol hydroxylase                                                                           |
|                               | <i>Cronobacter sakazakii</i> ASM98282v1                       | Esterase, esterase family protein, 2-octaprenyl-3-methyl-6-methoxy-1,4-benzoquinol hydroxylase, alkane 1-monooxygenase                                                                                           |
|                               | <i>Klebsiella oxytoca</i> ASM102219v1                         | Esterase, esterase family protein, 2-octaprenyl-3-methyl-6-methoxy-1,4-benzoquinol hydroxylase, bifunctional 3-(3-hydroxyphenyl)propionate/3-hydroxycinnamic acid hydroxylase, 4-hydroxybenzoate 3-monooxygenase |
|                               | <i>Citrobacter sedlakii</i> NBRC 105722                       | Esterase, 2-octaprenyl-6-methoxyphenyl hydroxylase, 2-octaprenyl-3-methyl-6-methoxy-1,4-benzoquinol hydroxylase, 3-hydroxybenzoate 6-monooxygenase                                                               |
|                               | <i>Alcaligenes</i> sp. Strain HPC1271                         | polyhydroxyalkanoate depolymerase, alpha/beta hydrolase, aromatic-ring-hydroxylating dioxygenase subunit beta, monooxygenase, phenol 2-monooxygenase, phenol hydroxylase, cytochrome P450                        |
|                               | <i>Aeromonas taiwanensis</i> LMG 24683                        | Esterase, 2-octaprenyl-6-methoxyphenyl hydroxylase                                                                                                                                                               |
|                               | <i>Brevundimonas diminuta</i> 48290_B02                       | Alpha/beta hydrolase, monooxygenase, phenol hydroxylase                                                                                                                                                          |
|                               | <i>Serratia marcescens</i> subsp. <i>marcescens</i> Db11      | Esterase, alpha/beta hydrolase, 2-octaprenyl-3-methyl-6-methoxy-1,4-benzoquinol hydroxylase                                                                                                                      |
|                               | <i>Pseudomonas aeruginosa</i> PAO1                            | Esterase, alpha/beta hydrolase, 4-hydroxybenzoate 3-monooxygenase, cytochrome P450, alkane 1-monooxygenase                                                                                                       |
|                               | <i>Rhodococcus ruber</i> ASM274172v1                          | Esterase, alpha/beta hydrolase, aromatic ring hydroxylase, cytochrome P450, alkane hydroxylase                                                                                                                   |
|                               | Eukaryota                                                     | <i>Gloeophyllum trabeum</i>                                                                                                                                                                                      |
| <i>Talaromyces islandicus</i> |                                                               | Feruloyl esterase B, putative feruloyl esterase A                                                                                                                                                                |

**Table S2.** DNA sequences of higher potential subclass enzymes from target microorganisms including cytochrome P450, monooxygenase, and aromatic ring hydroxylase.

| Enzymes from Species                                                    | Accession NO.  |                                                                                                                                                                                                                                                                                                                                                                                                                                                                                                                                                                                                                                                                                                                                                                                                                                                                                                                                                                                                                                                                                                                                                                                                                                                                                                                                                                                                                                                                                                                                                                                                                                                                                                                                                                                                                                                                                                                                                                                                                                                                                                                                                                                                                                                                                                                                                                                                                                                                                                                                                                                                                                                                                                                                                                                                                                                                                                                                                                                                          |
|-------------------------------------------------------------------------|----------------|----------------------------------------------------------------------------------------------------------------------------------------------------------------------------------------------------------------------------------------------------------------------------------------------------------------------------------------------------------------------------------------------------------------------------------------------------------------------------------------------------------------------------------------------------------------------------------------------------------------------------------------------------------------------------------------------------------------------------------------------------------------------------------------------------------------------------------------------------------------------------------------------------------------------------------------------------------------------------------------------------------------------------------------------------------------------------------------------------------------------------------------------------------------------------------------------------------------------------------------------------------------------------------------------------------------------------------------------------------------------------------------------------------------------------------------------------------------------------------------------------------------------------------------------------------------------------------------------------------------------------------------------------------------------------------------------------------------------------------------------------------------------------------------------------------------------------------------------------------------------------------------------------------------------------------------------------------------------------------------------------------------------------------------------------------------------------------------------------------------------------------------------------------------------------------------------------------------------------------------------------------------------------------------------------------------------------------------------------------------------------------------------------------------------------------------------------------------------------------------------------------------------------------------------------------------------------------------------------------------------------------------------------------------------------------------------------------------------------------------------------------------------------------------------------------------------------------------------------------------------------------------------------------------------------------------------------------------------------------------------------------|
| <i>Bacillus cereus</i><br>ATCC<br>14579_cytochrome P450                 | WP_000062123.1 | <p>ATGTCAATGAAAAACAAAGTTGGGTAAAGCATAGAGGATGGCATTAAATTTAG<br/>           CTTCAGCTCAGTTTAAAGAAGATGCGTATGAAATTTATAAAGAATCGCGAAA<br/>           AAAACAACCTATATTATTTGTAAACCAAGTTGAAATCGGTAAAGAATGGCTC<br/>           ATTACTAGATATGAAGATGCTCTGCCACTTTTAAAAGATAATCGTTTAAAAAA<br/>           AGATTGGACAAATGTGTTTTCTCAAGATATAAAGAACATGTATCTTTCCGTTG<br/>           ATAATAGTGACCCTTAACAACACATATGCTAAATTCAGATCCACCTAACCA<br/>           CAGTCGTTTACGATCTTTAGTTCAAAAAGCTTTTACACCGAAGATGATTGCAC<br/>           AATTAGACGGAAGAATTCAGAGAATAGCAGATGATTTGATAAGTGATATAGA<br/>           GCGAAAAGGTACATTAATCTTGTGGATGATTATTCATTTCCATTACCAATTA<br/>           TTGTAATAAGCGAGATGCTCGGTATTCCAAAAGAAGATCAAGCGAAATTTAG<br/>           GATTTGGTCTCATGCTGTTATTGCATCACCGAAACACCTGAAGAAATAAAA<br/>           GAGACTGAAAAACAATCTGAATTTATTACATATCTTCAATATTTAGTTGA<br/>           TATTAAGAAAAGAGCCAAAAGAAGACTTGGTGAGTGCTTTAATACTTGCA<br/>           GAGAGTGAAGGGCATAAACTTAGCGCTCGGGAACCTATATTCAATGATAATGC<br/>           TATTAATTGTCGCAGGACATGAGACGACAGTGAATTTAATTACAAATACGGT<br/>           ATTAGCACTTCTTGAATAATCCAAATCAATTACAGTTATTAAGATAATCCAA<br/>           AACTAATTGATTCCGGCTATTGAGGAAGGATTGCGTTATTATTCTCCAGTTGAG<br/>           GTTACAACCTGCAAGATGGGCAGCGGAACCTTTTCAAATTCACCATCAAACAA<br/>           TACAGAAAGGAGATATGGTTATTATTGCATTGGCTTCAGCGAACCGTGATGA<br/>           AACAGTATTTGAAAATCCAGAAATATTTGATATTACACGGGAGAACAACCGT<br/>           CACATTGCCTTTGGTCATGGTAGTCATTTCTGCTTAGGAGCTCCACTTGCGAGG<br/>           TTAGAAGCAAAGATTGCTATTACTACTTTGTTAATCGAATGCCTGAACTACA<br/>           AATAAAAGGGAATCGTGAAGAAATTAATGGCAAGGTAACCTATTTAATGCGT<br/>           TCTTTAGAGGAATTACCTTTAACTTTCTAG<br/>           ATGACTGAAGTAAAACACTTTCCAAAAGAAGAGGGTCTCGATCATAGCCTTG<br/>           ATTTATTAAGAAGGCTATTTGTTTATTACAAATCGCAGTACTGCATTTCAA<br/>           TCAGATATTTTTGAAACACGCCTGCTGGGAGAGCGGGTTATTTGTCTGCGAGG<br/>           CAAGGAAGCTGCATCAATCTTTACGATACGCAGAAATTCAAACGAGAAGGT<br/>           GCAGCCCCAAATCGAATTCAGAAAACCTGTTAGGGAAAAACGGGGTACAA<br/>           TCACTGGATGGTGAAGCACATCAGCATCGGAAGGCAATGTTTATGTCGTTAAT<br/>           GACACCTGCTTCTCCAAAGAATGCGTGCTTTATAAAAAAAGAGTGGGAC<br/>           ATTGCGGCCAAGAAGTTTTCAAGAAAAGAAATTATCCTTTACGAAGAAG<br/>           CAAAAGGGTGCTTTGTAAAGCAGCTTGTGACTGGGCTGGTGTTCCTCTTAAA<br/>           GAGAACAATGTTGAGGAAACGGCCAATTTACTTGGATTACTATTTGAAACAC<br/>           CCGCAGCACTCGGCCCTAAGCATTGGCAAGGCAGACACGCACGGACAAAAT<br/>           TGGAAAAATGGCTTAAGGAATTAGTCATAGAAGTTCGAAACGGCAAATTCCT<br/>           CCTCCTGAAGATAAATCCTTATTCATTATTTCAAATCACCGCAATTTGGATG<br/>           GTGAGCTGCTTGTGACAGACATCGCCGCTGTTGAACTATTAATATTTGCGT<br/>           CCTATTGTCGCGGTAGCCGTGTATATTTGTTTTACGGCGCTTGCTGTATACCAG<br/>           CATCCAAAAGAAGCAGGCAAACCTGCGCGGGTATGATGAAAATCTTCTTCAGA<br/>           ACTTTGTACAAGAGGTCAGGAGATTTTATCCATTTTTTCCGTTTGCACCAGCA<br/>           AGAGTAAAAGCGGACTTCACATGGAATGGATATTTTGGAGAAAATACAT<br/>           TAACACTCCTCGATTTATATGGAACAAACCACCACCCTAAATTATGGGATAA</p> |
| <i>Bacillus<br/>gottheilii<br/>Marseille-<br/>P3555_cytochrome P450</i> | WP_080848536.1 | <p>ATGACTGAAGTAAAACACTTTCCAAAAGAAGAGGGTCTCGATCATAGCCTTG<br/>           ATTTATTAAGAAGGCTATTTGTTTATTACAAATCGCAGTACTGCATTTCAA<br/>           TCAGATATTTTTGAAACACGCCTGCTGGGAGAGCGGGTTATTTGTCTGCGAGG<br/>           CAAGGAAGCTGCATCAATCTTTACGATACGCAGAAATTCAAACGAGAAGGT<br/>           GCAGCCCCAAATCGAATTCAGAAAACCTGTTAGGGAAAAACGGGGTACAA<br/>           TCACTGGATGGTGAAGCACATCAGCATCGGAAGGCAATGTTTATGTCGTTAAT<br/>           GACACCTGCTTCTCCAAAGAATGCGTGCTTTATAAAAAAAGAGTGGGAC<br/>           ATTGCGGCCAAGAAGTTTTCAAGAAAAGAAATTATCCTTTACGAAGAAG<br/>           CAAAAGGGTGCTTTGTAAAGCAGCTTGTGACTGGGCTGGTGTTCCTCTTAAA<br/>           GAGAACAATGTTGAGGAAACGGCCAATTTACTTGGATTACTATTTGAAACAC<br/>           CCGCAGCACTCGGCCCTAAGCATTGGCAAGGCAGACACGCACGGACAAAAT<br/>           TGGAAAAATGGCTTAAGGAATTAGTCATAGAAGTTCGAAACGGCAAATTCCT<br/>           CCTCCTGAAGATAAATCCTTATTCATTATTTCAAATCACCGCAATTTGGATG<br/>           GTGAGCTGCTTGTGACAGACATCGCCGCTGTTGAACTATTAATATTTGCGT<br/>           CCTATTGTCGCGGTAGCCGTGTATATTTGTTTTACGGCGCTTGCTGTATACCAG<br/>           CATCCAAAAGAAGCAGGCAAACCTGCGCGGGTATGATGAAAATCTTCTTCAGA<br/>           ACTTTGTACAAGAGGTCAGGAGATTTTATCCATTTTTTCCGTTTGCACCAGCA<br/>           AGAGTAAAAGCGGACTTCACATGGAATGGATATTTTGGAGAAAATACAT<br/>           TAACACTCCTCGATTTATATGGAACAAACCACCACCCTAAATTATGGGATAA</p>                                                                                                                                                                                                                                                                                                                                                                                                                                                                                                                                                                                                                                                                                                                                                                                                                                                                                                                                                                                                                                                                                                                                                                                                                                                                                                                                                                                                                                                                                                                                                                                                                                                                               |

|                                                                                                                                  |                       |                                                                                                                                                                                                                                                                                                                                                                                                                                                                                                                                                                                                                                                                                                                                                                                                                                                                                                                                                                                                                                                                                                                                                                                                                                                                                                                                                                                                                                                                                                                                                                                                                                                                                                                                                                                                                                                                                                                                                                                                                                                                                                                                                                                                                                                                                                                                                                                                                                                                                                                                                                                                                                                       |
|----------------------------------------------------------------------------------------------------------------------------------|-----------------------|-------------------------------------------------------------------------------------------------------------------------------------------------------------------------------------------------------------------------------------------------------------------------------------------------------------------------------------------------------------------------------------------------------------------------------------------------------------------------------------------------------------------------------------------------------------------------------------------------------------------------------------------------------------------------------------------------------------------------------------------------------------------------------------------------------------------------------------------------------------------------------------------------------------------------------------------------------------------------------------------------------------------------------------------------------------------------------------------------------------------------------------------------------------------------------------------------------------------------------------------------------------------------------------------------------------------------------------------------------------------------------------------------------------------------------------------------------------------------------------------------------------------------------------------------------------------------------------------------------------------------------------------------------------------------------------------------------------------------------------------------------------------------------------------------------------------------------------------------------------------------------------------------------------------------------------------------------------------------------------------------------------------------------------------------------------------------------------------------------------------------------------------------------------------------------------------------------------------------------------------------------------------------------------------------------------------------------------------------------------------------------------------------------------------------------------------------------------------------------------------------------------------------------------------------------------------------------------------------------------------------------------------------------|
| <p><i>Enterococcus faecium</i><br/>IHC3_aromati<br/>c ring<br/>hydroxylase</p>                                                   | <p>RCT70246.1</p>     | <p>CCCTGAGCTCTTTCAGCCGGATCGTTTTTCAAACCTGGAAGGACAGTCCATTCA<br/>GTTTTATTCTCAAGGCGGAGGTGACCATGATTTTGGTCATCGCTGTGCAGGC<br/>GAATGGGTGACGATTGAAATTATGAAGGAAACGCTGAATTTTCTTGTGAATA<br/>AAATTAGCTTCGCCATTCCAGATCAGGACTTAAGCTATAGCTTTAATGATATT<br/>CCAGCTCTTCTCACAGTAAAATCATTATGAAAGAAATTCATTTAAAATAA<br/>ATGATAAATAAAAATCGTGTTAAGGAGTGTCTGACGATGAGCGAAGCAAAC<br/>CAAGAACGGTCTGGACAAGAAATAGAATAATCAAAGAACGTATTCTTGCTG<br/>CCTTGAAAATGGTGATTGATCCTGAATTAGGAATCGACATCGTCAATTTAGGC<br/>TTGATTTATGATATAGAATTCAATCCTGAAAATGGAGAAAACAGTCATTAAGA<br/>TGACTCTAACAACATATGGGCTGTCCATTAGCAGATATTTAACAGAATCTATC<br/>CATGACGCATTAAGAAGTGCCAGAAGTAACGAAAGAAGAAGTAAAATA<br/>GTCTGGTAG<br/>ATGAACACCCCGTCTGGTTCCTTTCGAAGCCACGCCGCGCTATGTGCGGGT<br/>CGAGGGCCGACCCCGAAGGGTTTGTGCAGTTCGCCTTCAGCGTGGCCGAC<br/>CCGGAGCTCAACGTCGAACTGATCATGCCGGAACCGATGTTTGAAGCCTTCT<br/>GCTGCGTCAACCGGTGCGCTTCCTGCCCCGCTGGAAACCGCGCCGACGCC<br/>GCAAGCCGACGACTGA<br/>ATGTCAGCCACCGTGCACACGTCTATATCGCCCTGCAGAACACGACGACA<br/>CCCGACCCATCATCGACGCCATACCGAGGCCAACCCGCATGCGGTGGTGTG<br/>GCAGTTTCCCGCCATGGTCAAGATCGACGCCCGCCACCTGACCATCGTG<br/>CGCGAACTGGTGGCCGGCAAGCTCGGCCGCGACTGGGACCTGCAGGAGATC<br/>CACCTGAACCTGATCTCGCTGTGCGGAAACATCGACGAAGACGAAGACGCCT<br/>TCACGCTGCGCTGGAACGCCTGA<br/>ATGGACACCCTGATCAAAGAATTCGACGTGGCATTGCGCGCCATTGCCGGCG<br/>CCACGCGCACCGCGCGCGCAACCCGGCTGACCGGCTGGCGCCGGACACCG<br/>AACAGATGAGCGCCGATGAACGCCGCCACGTGGCCGGGCTGATGCGCATCA<br/>ACCATGTGCGCGAGGTCTGCGCGCAGGCCCTGTACCAGGCCCAGAAGCTCAC<br/>CGCGCGCGACCGCGCGGTGCGCGCGCAGATGGATGCCGCCGCGCGCAAGA<br/>GGAAGACCACCTGGCCTGGTGCGCCGAGCGCCTGCGCGAGCTGGGCTCGCGC<br/>CCGAGCCTGCTCAACCCGCTGTGGTACGCCGGCGCCTTCGCCATCGGCTGGAT<br/>GGCCGGCCGCGCCGGCGACCGCGTCAGCCTGGGCTTCGTGCGCGAGACCGAG<br/>CGCCAGGTCGAGCACCACTGGGCGGGCACCTGGACCGCTGCCCGAGGCC<br/>GACGGCCGCTCGCGCGCCATCCTCGAGCAGATGCGCGACGACGAGATCCGCC<br/>ACGGCAACGCCGCGCGGATGCCGGCGGGATCCCGTTACCTGCCCGGTGCG<br/>GGCGCTGATGCGCGCGCCTCGCGCGTATGACCACCGCCGCTACCGGATC<br/>TGA<br/>ATGATCCCCATCTATCCGGAGGGCAAGGCCCGTTTCGCCCGGCGCAAAGC<br/>GCCTCGACCTGGATACTTCTTGGTGAAGACAAGGCAAGCGGCGACTACCG<br/>GCTGCACCGCGCGCCTTCACTGACGAAGAGCTGTTTGAACCTCGAGATGAAG<br/>CACATCTTCGAGGGCAACTGGATCTACCTGGCGCACGAAAGCCAGATCCCGA<br/>ACAACAACGACTACTACACCACCATATCGGCCGCCAGCCGGTGGTGATCGC<br/>GCGCAATCGCCAGGGCGAACTGAACGCCTTCATCAACCGGTGCAGCCACCGC<br/>GGCGCCATGCTGTGCCGCCACAAGCGCGGCAACAAAGCCACCTACACCTGCC<br/>CGTTCCACGGCTGGACCTTCAACAACAGCGGCAAGCTGCTGAAGGTGAAGGA<br/>TCCCGAGAACGCCGGCTACCCTGACTGCTTCAACAAGGAAGGCTCGCACGAC<br/>CTGAAGAAGGTGGCGCGCTTCGAGAATAACCGCGGCTTCCTGTTGCGCAGCC<br/>TGAACGCTGACGTGCCGCCGCTGAAGGATTTCTGGGCGAAGCGGCGCGCGT<br/>CATCGACATGATCGTCGACCAGTCGGCCGACGGGCTCGAGGTGCTGCGCGGC</p> |
| <p><i>Cupriavidus necator</i><br/>H16_phenol<br/>hydroxylase</p>                                                                 | <p>WP_010810421.1</p> | <p>ATGAACACCCCGTCTGGTTCCTTTCGAAGCCACGCCGCGCTATGTGCGGGT<br/>CGAGGGCCGACCCCGAAGGGTTTGTGCAGTTCGCCTTCAGCGTGGCCGAC<br/>CCGGAGCTCAACGTCGAACTGATCATGCCGGAACCGATGTTTGAAGCCTTCT<br/>GCTGCGTCAACCGGTGCGCTTCCTGCCCCGCTGGAAACCGCGCCGACGCC<br/>GCAAGCCGACGACTGA<br/>ATGTCAGCCACCGTGCACACGTCTATATCGCCCTGCAGAACACGACGACA<br/>CCCGACCCATCATCGACGCCATACCGAGGCCAACCCGCATGCGGTGGTGTG<br/>GCAGTTTCCCGCCATGGTCAAGATCGACGCCCGCCACCTGACCATCGTG<br/>CGCGAACTGGTGGCCGGCAAGCTCGGCCGCGACTGGGACCTGCAGGAGATC<br/>CACCTGAACCTGATCTCGCTGTGCGGAAACATCGACGAAGACGAAGACGCCT<br/>TCACGCTGCGCTGGAACGCCTGA<br/>ATGGACACCCTGATCAAAGAATTCGACGTGGCATTGCGCGCCATTGCCGGCG<br/>CCACGCGCACCGCGCGCGCAACCCGGCTGACCGGCTGGCGCCGGACACCG<br/>AACAGATGAGCGCCGATGAACGCCGCCACGTGGCCGGGCTGATGCGCATCA<br/>ACCATGTGCGCGAGGTCTGCGCGCAGGCCCTGTACCAGGCCCAGAAGCTCAC<br/>CGCGCGCGACCGCGCGGTGCGCGCGCAGATGGATGCCGCCGCGCGCAAGA<br/>GGAAGACCACCTGGCCTGGTGCGCCGAGCGCCTGCGCGAGCTGGGCTCGCGC<br/>CCGAGCCTGCTCAACCCGCTGTGGTACGCCGGCGCCTTCGCCATCGGCTGGAT<br/>GGCCGGCCGCGCCGGCGACCGCGTCAGCCTGGGCTTCGTGCGCGAGACCGAG<br/>CGCCAGGTCGAGCACCACTGGGCGGGCACCTGGACCGCTGCCCGAGGCC<br/>GACGGCCGCTCGCGCGCCATCCTCGAGCAGATGCGCGACGACGAGATCCGCC<br/>ACGGCAACGCCGCGCGGATGCCGGCGGGATCCCGTTACCTGCCCGGTGCG<br/>GGCGCTGATGCGCGCGCCTCGCGCGTATGACCACCGCCGCTACCGGATC<br/>TGA<br/>ATGATCCCCATCTATCCGGAGGGCAAGGCCCGTTTCGCCCGGCGCAAAGC<br/>GCCTCGACCTGGATACTTCTTGGTGAAGACAAGGCAAGCGGCGACTACCG<br/>GCTGCACCGCGCGCCTTCACTGACGAAGAGCTGTTTGAACCTCGAGATGAAG<br/>CACATCTTCGAGGGCAACTGGATCTACCTGGCGCACGAAAGCCAGATCCCGA<br/>ACAACAACGACTACTACACCACCATATCGGCCGCCAGCCGGTGGTGATCGC<br/>GCGCAATCGCCAGGGCGAACTGAACGCCTTCATCAACCGGTGCAGCCACCGC<br/>GGCGCCATGCTGTGCCGCCACAAGCGCGGCAACAAAGCCACCTACACCTGCC<br/>CGTTCCACGGCTGGACCTTCAACAACAGCGGCAAGCTGCTGAAGGTGAAGGA<br/>TCCCGAGAACGCCGGCTACCCTGACTGCTTCAACAAGGAAGGCTCGCACGAC<br/>CTGAAGAAGGTGGCGCGCTTCGAGAATAACCGCGGCTTCCTGTTGCGCAGCC<br/>TGAACGCTGACGTGCCGCCGCTGAAGGATTTCTGGGCGAAGCGGCGCGCGT<br/>CATCGACATGATCGTCGACCAGTCGGCCGACGGGCTCGAGGTGCTGCGCGGC</p>                                                                                                                                                                                                                                                                                                                                                                                                                                                                                                                                                                                                                                                                |
| <p><i>Cupriavidus necator</i><br/>H16_monoox<br/>ygenase</p>                                                                     | <p>WP_010810419</p>   | <p>ATGTCAGCCACCGTGCACACGTCTATATCGCCCTGCAGAACACGACGACA<br/>CCCGACCCATCATCGACGCCATACCGAGGCCAACCCGCATGCGGTGGTGTG<br/>GCAGTTTCCCGCCATGGTCAAGATCGACGCCCGCCACCTGACCATCGTG<br/>CGCGAACTGGTGGCCGGCAAGCTCGGCCGCGACTGGGACCTGCAGGAGATC<br/>CACCTGAACCTGATCTCGCTGTGCGGAAACATCGACGAAGACGAAGACGCCT<br/>TCACGCTGCGCTGGAACGCCTGA<br/>ATGGACACCCTGATCAAAGAATTCGACGTGGCATTGCGCGCCATTGCCGGCG<br/>CCACGCGCACCGCGCGCGCAACCCGGCTGACCGGCTGGCGCCGGACACCG<br/>AACAGATGAGCGCCGATGAACGCCGCCACGTGGCCGGGCTGATGCGCATCA<br/>ACCATGTGCGCGAGGTCTGCGCGCAGGCCCTGTACCAGGCCCAGAAGCTCAC<br/>CGCGCGCGACCGCGCGGTGCGCGCGCAGATGGATGCCGCCGCGCGCAAGA<br/>GGAAGACCACCTGGCCTGGTGCGCCGAGCGCCTGCGCGAGCTGGGCTCGCGC<br/>CCGAGCCTGCTCAACCCGCTGTGGTACGCCGGCGCCTTCGCCATCGGCTGGAT<br/>GGCCGGCCGCGCCGGCGACCGCGTCAGCCTGGGCTTCGTGCGCGAGACCGAG<br/>CGCCAGGTCGAGCACCACTGGGCGGGCACCTGGACCGCTGCCCGAGGCC<br/>GACGGCCGCTCGCGCGCCATCCTCGAGCAGATGCGCGACGACGAGATCCGCC<br/>ACGGCAACGCCGCGCGGATGCCGGCGGGATCCCGTTACCTGCCCGGTGCG<br/>GGCGCTGATGCGCGCGCCTCGCGCGTATGACCACCGCCGCTACCGGATC<br/>TGA<br/>ATGATCCCCATCTATCCGGAGGGCAAGGCCCGTTTCGCCCGGCGCAAAGC<br/>GCCTCGACCTGGATACTTCTTGGTGAAGACAAGGCAAGCGGCGACTACCG<br/>GCTGCACCGCGCGCCTTCACTGACGAAGAGCTGTTTGAACCTCGAGATGAAG<br/>CACATCTTCGAGGGCAACTGGATCTACCTGGCGCACGAAAGCCAGATCCCGA<br/>ACAACAACGACTACTACACCACCATATCGGCCGCCAGCCGGTGGTGATCGC<br/>GCGCAATCGCCAGGGCGAACTGAACGCCTTCATCAACCGGTGCAGCCACCGC<br/>GGCGCCATGCTGTGCCGCCACAAGCGCGGCAACAAAGCCACCTACACCTGCC<br/>CGTTCCACGGCTGGACCTTCAACAACAGCGGCAAGCTGCTGAAGGTGAAGGA<br/>TCCCGAGAACGCCGGCTACCCTGACTGCTTCAACAAGGAAGGCTCGCACGAC<br/>CTGAAGAAGGTGGCGCGCTTCGAGAATAACCGCGGCTTCCTGTTGCGCAGCC<br/>TGAACGCTGACGTGCCGCCGCTGAAGGATTTCTGGGCGAAGCGGCGCGCGT<br/>CATCGACATGATCGTCGACCAGTCGGCCGACGGGCTCGAGGTGCTGCGCGGC</p>                                                                                                                                                                                                                                                                                                                                                                                                                                                                                                                                                                                                                                                                                                                                                                                                                                                                                                                    |
| <p><i>Cupriavidus necator</i><br/>H16_2-<br/>polyprenyl-3-<br/>methyl-6-<br/>methoxy-1,4-<br/>benzoquinone<br/>monooxygenase</p> | <p>WP_010814779.1</p> | <p>ATGATCCCCATCTATCCGGAGGGCAAGGCCCGTTTCGCCCGGCGCAAAGC<br/>GCCTCGACCTGGATACTTCTTGGTGAAGACAAGGCAAGCGGCGACTACCG<br/>GCTGCACCGCGCGCCTTCACTGACGAAGAGCTGTTTGAACCTCGAGATGAAG<br/>CACATCTTCGAGGGCAACTGGATCTACCTGGCGCACGAAAGCCAGATCCCGA<br/>ACAACAACGACTACTACACCACCATATCGGCCGCCAGCCGGTGGTGATCGC<br/>GCGCAATCGCCAGGGCGAACTGAACGCCTTCATCAACCGGTGCAGCCACCGC<br/>GGCGCCATGCTGTGCCGCCACAAGCGCGGCAACAAAGCCACCTACACCTGCC<br/>CGTTCCACGGCTGGACCTTCAACAACAGCGGCAAGCTGCTGAAGGTGAAGGA<br/>TCCCGAGAACGCCGGCTACCCTGACTGCTTCAACAAGGAAGGCTCGCACGAC<br/>CTGAAGAAGGTGGCGCGCTTCGAGAATAACCGCGGCTTCCTGTTGCGCAGCC<br/>TGAACGCTGACGTGCCGCCGCTGAAGGATTTCTGGGCGAAGCGGCGCGCGT<br/>CATCGACATGATCGTCGACCAGTCGGCCGACGGGCTCGAGGTGCTGCGCGGC</p>                                                                                                                                                                                                                                                                                                                                                                                                                                                                                                                                                                                                                                                                                                                                                                                                                                                                                                                                                                                                                                                                                                                                                                                                                                                                                                                                                                                                                                                                                                                                                                                                                                                                                                                                                                                                                                                                                                                                              |
| <p><i>Cupriavidus necator</i><br/>H16_benzoate<br/>1,2-<br/>dioxygenase<br/>large subunit</p>                                    | <p>WP_013956903.1</p> | <p>ATGATCCCCATCTATCCGGAGGGCAAGGCCCGTTTCGCCCGGCGCAAAGC<br/>GCCTCGACCTGGATACTTCTTGGTGAAGACAAGGCAAGCGGCGACTACCG<br/>GCTGCACCGCGCGCCTTCACTGACGAAGAGCTGTTTGAACCTCGAGATGAAG<br/>CACATCTTCGAGGGCAACTGGATCTACCTGGCGCACGAAAGCCAGATCCCGA<br/>ACAACAACGACTACTACACCACCATATCGGCCGCCAGCCGGTGGTGATCGC<br/>GCGCAATCGCCAGGGCGAACTGAACGCCTTCATCAACCGGTGCAGCCACCGC<br/>GGCGCCATGCTGTGCCGCCACAAGCGCGGCAACAAAGCCACCTACACCTGCC<br/>CGTTCCACGGCTGGACCTTCAACAACAGCGGCAAGCTGCTGAAGGTGAAGGA<br/>TCCCGAGAACGCCGGCTACCCTGACTGCTTCAACAAGGAAGGCTCGCACGAC<br/>CTGAAGAAGGTGGCGCGCTTCGAGAATAACCGCGGCTTCCTGTTGCGCAGCC<br/>TGAACGCTGACGTGCCGCCGCTGAAGGATTTCTGGGCGAAGCGGCGCGCGT<br/>CATCGACATGATCGTCGACCAGTCGGCCGACGGGCTCGAGGTGCTGCGCGGC</p>                                                                                                                                                                                                                                                                                                                                                                                                                                                                                                                                                                                                                                                                                                                                                                                                                                                                                                                                                                                                                                                                                                                                                                                                                                                                                                                                                                                                                                                                                                                                                                                                                                                                                                                                                                                                                                                                                                                                              |

*Cupriavidus  
necator*  
H16\_aromatic  
ring-  
hydroxylating  
dioxygenase  
subunit alpha

WP\_010811430.1

TCGTCCACCTACACGTTTCGAGGGCAACTGGAAGCTGCAGGCCGAGAACGGC  
GCCGATGGCTACCACGTGTCGGCGGTGCACTGGAAGTACGCCGCAACCACCA  
GCCAGCGCAAGCAGAAGAACGCGCAGGAAGACAAGATCCGCGCCATGGAC  
GCCGGCAAGTGGGGCCAGCAGGGCGGGCTTCTACGCCTTCGAGCATGGCC  
ACATGCTGCTGTGGACGCGCTGGGCCAACCCGGAGGACCGCCCCAACTTCAG  
CCGCCGCGAGGAATTCCGCGAGCGTTGCGGCGCCGAGACCGCGGACTGGAT  
GATCCAGAACTCTCGCAACCTGTGCCTTTATCCCAACGTCTACCTGATGGACC  
AGTTCGGCTCGCAGATCCGCCTGCTGCGTCCGCTGGCCGTCGACAAGACCGA  
GGTCACCATCTACTGCATCGCGCCGAAGGGAGAATCCGACGAGGCGCGCGC  
GCGCCGCATCCGCCAGTACGAGGACTTCTTCAACGTACGCGGCATGGCCACC  
CCCGACGACCTCGAGGAGTTCCGCGCTTGCCAGCAGGGGCTACGCCGGGCAGG  
CACTGGCCTGGAACGACATGTGCCGCGGCGCAAGCACTGGATCGACGGTGC  
CGACGAGGCCGCGCAGCGCATCGGACTCAAGCCCGTGATGAGCGGGGTGCG  
CACCGAGGACGAGGGCCTCTACACGGTGCAGCACCGCTACTGGCTGGACGTG  
ATGAAGAAGGCCGTGGCAGAGCAATCCGCCGAAGCCGCGAATGAAGCCACC  
GACACCACCGACGCCGCCGACGGAGCGCAGCATGA  
ATGACCGAGACCCACGACACGAAGCAGGTCAGGCCGCCGATGCGGGCCGGG  
CCCGAACTGGGCCAGTGGCACCCCGTGCTGGCCATCGAACAGGCCGATGGCG  
ACGGCCCCCTTCGCCGCACGGCTCTTTGGCCGCGCGTGGTGCTGTGGCGCAAT  
GCCGACGGCTGGCACGCCTGGGACGACCGCTGTCCGCACCGCGGCGCCGCTT  
TCACGCTGGGCGCCGTGCACGATGGCCTGCTGCATTGCGGCTATCACGGCTG  
GCGCTTTCCTCGGGCGGCCGCTGCACGCGCTATCCCGCCCACCCGGAAGT  
GTGCCTGCGCCGCGCGCCTGCGCCACCACGCACGCGGTGCGCGAGGGTACG  
GGCTGTTATGGGTACGCCTTGGCGGCGACGGCACCGAGGCCGTGCCCGAACT  
GCCGTCCTTCCCCGAGTACCACGACGCCGAATGCCGCCGCGTGGTCTGCGGC  
CCCTACGACGTTGCCACCTCGGCGCCACGGCTGGTGGAGAACTTCCTCGACA  
TGGCGCACTTCGGCTATGTCCATGACGGCTACCTGGGTGACCCGGCGCACAC  
CGAAGTGCCGCCCTATGAAGTGAAGCCATCGGCGATGCGCGCAAGCCCGA  
CGCGCTGCGCACCATCGGCTGCCGCGCCTGGCAGCCGCGCGCGCACGCCAGC  
GCCGCCGGCGGAGCCATGGTTCAGTATGAATAACCGCGTGGTTGCGCCCTACG  
CCGCGATCCTGACCAAGGTGCCCGACCTTGGCGACAACCATCGCGGCGCCAT  
CGCGCTGTTTATCGGCCCGCGGGACGAGGAATCGAGCCGCGTGTGGTTTCGTG  
ATGTCACTGGTGACAGACGATGACGACGCCAGCCTGCGCGAATTCCAGGACA  
CCATCTTCCTGCAGGACAAGCCGATCGTGGAATCGCAGCAGCCGCGCCGCT  
GCCGTTGCGCACCGGCGTGGAGGTGCCCGAGCCGGCGGACAAGCTGGCAGG  
CGCGTACCGCCGCTACCTGGCGGCGCATGGGGTGAGGTTTCGGCACGCTGGGC  
TAG  
ATGAAACCGATGAACTATTCCCTCTATCGCGAGAGCGCCCTCGGCACCGCGC  
GCGCCATTGAACTGCGACTGGAGATCGAGGCCTTCCACGCGGAATACTGCGC  
GGTGCTCGACGCCGGCCTGGTGGAGCAATGGCCCCGCTTCTTACCGAGGAT  
GCGCTTACCGGATACCGCGCGCGAGAATGCCGAGCGCAACCTGCCGGTGG  
GGCTGGTCTACGCCGAAGGGGTGGGCATGATGCGCGACCGCGCCGCTGCGAT  
TGCCAATACCCAGATGTTTCGCGCCGCGCTACAACCTGCACCTGGTGACCAAC  
ACGCGGGTCAGCGACGAAACCGCGGACGGCGATATCGTGCCACAGGCCAAC  
TACATGCTGCTGCAGACACTGGTGGAGGGCCCCACCACGATCCACCTGGCGG  
GGACCTACTACGACCGCTTCCGCCGCCAGGGTGGCAGCCTGCTGCTGCGCGA  
GCGGCAGGTTGTCTACGACACCACCATCATCGCCAACGACCTGGTCTACCCG  
GTCTAG

*Cupriavidus  
necator*  
H16\_aromatic  
-ring-  
hydroxylating  
dioxygenase  
subunit beta

WP\_041688019.1

*Burkholderia cepacia* ATCC 25416\_2-polyprenyl-3-methyl-6-methoxy-1,4-benzoquinone monooxygenase

WP\_027788457.1

ATGGTGTTTGATGAACTGATCAGCGAATTCGATCGCGGCCTGCGGTGCTGAC  
GGGCATTAGCCGATGAGCCGGCCGGTGCCCGCGCCGGCCGAGGCGCCCGC  
AGTCGAACTGACGCCCGGGAGCGTACGCATGCCGCCGGGCTGATGCGCGTG  
AACCACGTCGGCGAGGTCTGCGCTCAGGCGCTGTACCAGGCGCAGAAGCTCA  
CCGCGCGCACGGCATCCGCGAAGGCGATGTTTCGAGGAAGCCGCGCGGAGG  
AGGAGGATCACCTCGCGTGGACCGCGCACCGCCTGAAAGAGCTCGACTCGC  
GCCCCGAGCCTGTTGAACCCGCTCTGGTATGCGGGTTCGCTCGCGATCGGCGTG  
GCGGCTGGCGCGCTCGGCGACAAGGTCAGTCTCGGCTTCATGGCCGAGACCG  
AACGGCAGGTTCGAGAGCCATCTCGAAGGCCATATGTCCGAGTTGCCGGCGGC  
CGATACCGCGTCGCGCGCGATCGTCGACCAGATGCGTATCGACGAGGTGAAG  
CACGGCAAGGCCGCCGCCGACGCAGGCGGGATCGAACTGCCGCTGCCCGCG  
CGAATGCTGATGCGCGCCCGCTCGAAAGTCATGACGAGCACTGCGTACTATC  
TGTGA

*Burkholderia cepacia* ATCC 25416\_aromatic-ring-hydroxylating dioxygenase subunit beta

WP\_027792273.1

ATGACGATTTTCATCCGCATTGGCCGACGCACGGCCCGGACGCGCGGCACCG  
GAACGGTTGCGGCGACCTTCGCCGATTTCTACGGGCTCGTGGACCTGAACGC  
GCGCTACGCGTCCGCGCTGGATCGCGGCGACTGGGACGCGTGGCCGGAATTC  
TTCGAGGAGGACTGCACGTATCAGCTGTTGCCGCGGAGAACCATGAACGCG  
ACTTTCCGCTTTCGCGTCTCGCGTTCGAGAGCAAGGGGATGCTGAAGGATCG  
CGTGTACGGCATCAAGGAGACGCTGTTTTACGACCCGATTACCAGCGCCAC  
CTGATCGGCACGCCGCTCATCACGTATCTCGACGAATCGGTTCATCGAGGCCG  
AGACGAACTACGCGGTGCTGCGTACCAAGAGCGAGCAGATGAGCGACGTGT  
ACAACACCGGTTCGTTATCTCGACCGGATACGCCGCACGCCGCACGGGCTGCG  
TTTCGAGTCGCGCATCTGCGTGTACGACAGCGAGATGGTGCCGAATTCGATC  
ATCTATCCGATCTGA

*Burkholderia cepacia* ATCC 25416\_bifunctional 3-(3-hydroxyphenyl)propionate/3-hydroxycinnamic acid hydroxylase

WP\_027787836.1

ATGAATACCGAATCGAGCGCGCACGGCGACAGCACCGCCGAACACTGCGAC  
GTCCGATCGTCGGCTACGGCCCGACCGGCTCGTCGCAGCATCGATGCTGG  
GCCGCGCCGGCCATCGCGTGATCGTCTCGAACGCTGGCCGACGCCCTACGG  
CCTGCCGCGCCTCACGCACATCGACGGCGAAACCGCGCGCATCGTGCAGGCC  
AGTGCAGACGTCGATCACGCGTTCGCAACCGGAAGCCGTCGACACCTACC  
ACTACTGCGACGCGAACGGCGACCTGCTGCTCGAACTGAACTGGACCGGCCG  
CGCATGCGGCTATCCCGCGCACATCTCGATCTATCAGCCCGACATCGAGGAC  
GCGATCGATGCGCGCGCCAGCGCCTTCAGGAACGTGACGATCCTGCGCGGCT  
GGGAAGTCGACGCACTGCGGCAGGACGACGACGGCGTGACGCTGACCGCGC  
ATCCGTCGCCGCTACGGCCAGGACGCGCAATGGACCGACAGGCCCGCGGTCAT  
TCGCGCGCGCTACGTGATCGGGCGCCGACGGCGCGAACAGCCTCGTGCGCCG  
ACGCTCGGCATCGAACGCTCCGATTTTCGGCTGCAACGAACGCTGGCTCAATC  
TCGATTCGAAAACAAGCGCGATCTCGGGCGACGGCTGCGCGCGCACGACGA  
TCTACTGCGATCCGGCGCGCGGTACATGCACATGCCGATCGGCACGAAGCG  
CACGCGTTTCGAGCTGCGCGTGTGCCGAACGAATCGACGGCCGAATGGGAA  
ACGGAAGAAGCCGGCTGGAAGTGGCTCAACGACCACTACGGCTACGGCCCG  
GACGACCTGACGCTGCTGCGGCACGTCGTCTACACGTTTCGAGACGCGCATGG  
CCGAACGCTGGCGCGCCGGCCCGCTGCTGCTCGCGGGAGATGCGGCGCACA  
CGATGATGCCGTACATGGGACAAGGCGCGTGTCTCCGGCATGCGCGACGGCAT  
CAACCTCGCGTGGAAAGCTCGACCTGGTGTGCTGACCGGGCGCGCGTCCGCCGAC  
CTGCTCGACACCTATGAAGCCGAGCGCCCGCCGACGTCGACGGCGATCACGC  
AGATGTCGCTGTTTCTCGGGCAGGTCGTCAACGAGGACGATCCGCGCAAGGT  
CGCCGAGCGCGACGCGGCGTTCCGCTCCGGCAACATGCCGCCGATGCCGCCG  
TTCCCGAAGCTCGGCCACGGCATCGTGCACGCGCAAGCCGACGGCACGCTGC

*Burkholderia  
cepacia* ATCC  
17759\_2-  
octaprenylph  
enol  
hydroxylase

POM19962.1

TGCCGACGACGGGTGCACCGGCCCGCAAGGCCGCGCACGGCGCGGCGCGG  
CCGAGGGCCGTTTTGACGACGTGGTCGGCCAGGGTTTTCCAGCTCGTCACGCG  
CGAGCACCTGCCCGCCATCTCGACGACGCGCAGCGCGCATTCTCGCGCAG  
CTCGGCTGTACGTGGCCGTGTGGCCGACGACGTGTGCGCGCCGGATGCCG  
TGGTCGATCTCGACGGCGAGCAGCACGCGTTTCATGCACGCGCACGGCATCGC  
CGCGTATATCAAGCGGCCCGATTTTCATCGTGTTCGGTTCCGGTGACGGACCTGC  
GCGATCTCGGCGCGCTCGTCGACGCGCTGCGCGCCGACTGCACTGGTCTGC  
CGTTTCGAGCGAGCCTGCCGCGGCTTCGGCAGCCGTCACCCACGCATCGTGA  
ATGACTGCCACCACTCCTTCGACGTGCGCGTGGTCGGCGGGCGGGTCTCGTCGG  
CAAGACGGCCGCGCTCGCACTGACCCAGTCCGGCTACAAGACTGCCTTGCTC  
GCGCAGCCGGCCGCGCCGCGCCCGCCGATCTCGTATTCGACACGCGCGTCT  
ACGCGCTGTCTTCCAGTTCGCAGGCGTTGCTCGAGCGGCTGCGGGTCTGGCAG  
GCGCTCGACCATGGCCGCTCGCACCGGTCTACGACATGCGCGTATACGGCG  
ATGCGCACGCGGAAGTGCATTTCTCCGCGTACCAGGCATCCGTGCCGAGCT  
CGCGTGGATCGCCGAATCGTCGCTGGTCGAGGCGTCGCTTGACGCCGCGCTG  
CGTTCCAGCCGAACCTCACGTGGTTCGAGGCGCGCGCAGGGCTTCGACG  
TACACGACGACGACGCGCGTGTCTCACGCTGTCTCGGGGAGGTGCTGGAAGC  
GGATCTCGTCGTCGGCGCGGACGGCGCGCATTCGTGGGTGCGCTCGCAAATG  
GGGGCCAAAGTCGAACGGCGCGACTACCGGCAAACCGGTGTCTCGTCGCGAAC  
TTCAAGGCGTCGCTGCCGCATCGCGAGACGGCCTACCAGTGGTTCACGAAG  
GCGAGATCGTCGCGCTGTGCCGCTGCCGGACGGCCATGTGTCTCGCTCGTCTGG  
TCCGCGCACACCGCGCATGCGGATGAATTGCTCGCACTCGATCCGGCGCAGC  
TCGCGGCCGAGGTCGAGCGCGTGTCTCATGGCCAGGTCGGCACGCTCGACTG  
CGTGACGCCGGCCGCTGGCTTCCCGCTGGCGCTGCAGACGGTCGACAAGCTG  
ATCGCGCCGCGCGTGTGCGCTGGTCGGCGATGCCGCGCACCTGATCCACCCGC  
TCGCGGGACAGGGGATGAACCTCGGCCTGCGCGACGTGGCGGCGCTTGCCGA  
TGCGATCGCCGGAAGGAAAGCTTCCGCAACCTCGGCGATACGGTGTCTGCTG  
CGTCGCTACGAGCGTTCGCGCCGCGAGGACATCCGCGCGCTGATGGTCGCAA  
CCGACGGCCTGCAGCGGCTGTTCCGCGGTGCCGGGCTCGCTCGCGAAGGCCGT  
GCGCAATGCGGGCATGGCCTTCGTCTGGTGCAGCCGCTCGTGAAGCGCTGG  
CTCGTGTCCGCCGCGCTCGGCTGA

*Burkholderia  
pseudomallei*  
K96243\_2-  
polyprenyl-3-  
methyl-6-  
methoxy-1,4-  
benzoquinone  
monooxygenase

WP\_004527787.1

ATGCGCACGCAAGTCGCCATCATCGGCGCCGGGCCGTCCGGGCTGCTGCTTT  
CCCACCTGCTCCGTCTGCAAGGCGTCGATTCGGTCTGCTCGAGACCGGTTCA  
CGCGAATACTGCGAGAACCGGATCCGCGCCGGCGTGTGGAGCAGGGCACC  
GTCGACACGCTGAACGATGCGGGCCTCGGCGCGCGGATGCGGCGCGAAGGG  
CTCGTGATTGCGGCATCGAGCTGCTGTTTCGACGGCCGCGCCACCGGATCG  
ATTTCCGGCGAGCTGACGCCCCGGCCGCGCGATCACCGTCTACAGCCAGCACGA  
AGTCGTGCGCGACTTGATCGAGGCCGCGCTCGAGCACGGCCAGCCGATCCAC  
TTCGACGTGCGCGACGTGCGCGTGCACGACGTGCGGACCGAGCGGCGCTCGG  
TGACGTTTCATGCACGCGGACGGTCGCCCCGATCGGATCGATTGCGACTATGT  
CGCCGGCTGCGACGGCTTTCACGGCGTCGCGCGCCAGGCGATCCCCGCCGAG  
CGGCGGCGCACGTTTCGAGCGCGTGTACCCGTACGCCTGGCTCGGCATCCTCG  
CCGATGCGGCGCCGTCGCTCGACGAGCTCGTCTATGCGCATCACGCGCGCGG  
CTTCGCGCTGTTCTCGATGCGCTCGCCGACCGTACCCGACTGTACCTGCAAT  
GCCGCCCCGACGAGAACCTGGCCGAATGGCCGGATGCGCGCATCTGGGAGG  
AACTGGGCACGCGCTTCGAAAACGACGGCGGCTGGACGCCGACCCAGGCC  
GCATCACGCAGAAGAGCGTGACGCCGATGCGCAGCTTCGTGTGCGAGACGAT  
GCAGCACGGCCGGCTGTTCTCGCGGGCGACGCCGCGCACATCGTGCCGCCG

*Burkholderia  
pseudomallei*  
K96243\_4-  
hydroxybenz  
oate 3-  
monooxygena  
se

WP\_004556451.1

ACCGGCGCGAAGGGGATGAATCTCGCGGTCGCCGATGTCCGGGCGCTGTCCG  
GCGCGCTCGTCGCGCGCTACCGTCACGGCCGCGGCGATCTGCTCGATGCGTAT  
TCGTCAACCTGTCTGGAACGGATATGGCGTGCCGAGCATTTTTTCGTATTCCAT  
GACGAACATGCTGCACCCGTGCGCCGACGATTCCCGTTTCGTCAATCGGCTG  
AAGCTCGCCGAGCTCAGGTACGTGACGCGTTTCGCGCGCGGCCGCGCAGTCCG  
TCGCGGAGAACTACGTCGGCCTGCCGTTTCGACGAAACCGCGGGCGATGCGCC  
GTCGTTTGGCGAGGCGGCCGCCGCATGA  
ATGGTGTGTTGACGAGTTGATCACTGAATTTGACCGTGGGCTGCGCTCGATCGC  
GGGTGTGAGCCGGATGAGCCGCCCGGTGCCAAGCCCGCAGCCGCGGCGCC  
TGCCGAGCTTTCCGCAGCCGAGCGCAAGCATGCGGCGGGGTTGATGCGGGTG  
AATCACGTCGGCGAAGTCTGCGCGCAGGCGCTCTATCAGGCGCAGAAGCTCA  
CGACGTCTTCGGCCGGGCTGAAGGAGATGTTTCGAGCATGCGGCGCGCGAGGA  
AGAGGACCATCTCGCGTGGACCGCGCATCGATTGAAAGACCTCGATTTCGCGG  
CCGAGCCTGCTGAATCCGCTCTGGTATGCGGGCGCGCTCGCGATCGGCGTCTG  
CGCCGGGCGTCTCGGCGACAAGATGAGCCTCGGCTTCATGGCCGAGACGGAG  
CGGCAGGTGGAGAGCCACCTTGACGGCCATCTGTTCGGAGCTGCCGGCGGCCG  
ACGTCGAGTCGCGCGCGATCGTCGAGCAGATGCGCGCCGACGAGGTCAAGC  
ACGGCAAGTCGGCGACCGACCGCGCGCATCGAGCTGCCGATGCCGGCGC  
GCATGCTGATGCGCGCGCATCCAAGGTCATGACAAGCACTGCATACTATCT  
GTGA

*Klebsiella  
pneumoniae*  
subsp.  
*pneumoniae*  
HS11286\_2-  
octaprenyl-3-  
methyl-6-  
methoxy-1,4-  
benzoquinol  
hydroxylase

WP\_002894733.1

ATGACAATTCACGTAACAGATGTCGCCATCGTGGGCGGCGGCATGGTTCGGCG  
GCGCCCTGGCGTTAGGGCTGGCGCAACAGGGATTTACCGTGACGGTGCTTGA  
GAAAGCGGCGCCACCGCGTTCGATCCGGCATCCGCCCCGGATGTGCGGATC  
TCGGCGATCAGCGCGGCTTCGGTCGGCCTGCTGAAGAGTCTCGGCGTCTGGG  
ATGCCATACGGGCGATGCGCGTCCACGCGTATCGCCGCTGGAGACCTGGGA  
GTGGGAGAGCGCGCACGTCGCCTTCGACGCCGCGGAGCTCAAGCTGCCGGA  
GCTGGGCTATATGGTCGAGAACAAGGTTCTGCAATGGGGCCTGTGGCAAGCG  
CTGGCGGCGCATGAGGCGGTTACCCTGTGCGTCGGTAGCGAACTGAAAACGA  
TGCAGCGCGGCGAGACGCAGACGGCGTTGCATTTGCGCGAGGGGGAGACGA  
TCCACGCCCCGCTGGTTATCGGCGCCGACGGCGCTAACTCCCAGGTGCGGGA  
GATGGCCGGCATCGGCGTGCACGCCTGGCAATATCAGCAGTCCCTGTATGCTG  
ATCAGCGTCGAATGCGCCGACGATCCCGGCGACAGCACCTGGCAGCAGTTA  
CTCCCAGCGGCCACGCGCCTTCCTGCCGCTGTTTCGACCACTGGGCTTCGCTG  
GTCTGGTACGACGCCCCGGCGCGGATCCGTCAGCTGCAGAGCATGACCATGG  
CGCAGCTCCAGCAGGAGATCGCCAGTCACTTTCCGGCGCGGCTGGGACGGGT  
GACGCCGAGGCGGCCGCGCCTTCCCGCTACCCGGCGTTCATGCGCTGCAG  
TATGTTTCAGCCCGGCTGGCGCTGGTGGGCGATGCGGCGCACACCATTATCC  
ACTGGCGGGGACAGGGGGTTAACCTTGGCTATCGTGATGTTCGATGCCCTGCTG  
GAGATTCTGGCGGAAGCGCGCGGCCGCGGCGAAGACTGGGCCAGCCTGCCG  
GTGCTGAAGCGCTACCAGGCGCGGCGGCGAGCGGATAATTTTATCATGCAGT  
CGGGGATGGATCTGTTTTATGCCGTTTTAGCAATGACCTGGCGCCGGTGCGG  
ATGCTGCGTAATATTGGCCTGATGGCGGCTAACGCGCCGGGGTGCTGAAGC  
GTCAGGCGCTGAAGTATGCCTTAGGCTTGTA

*Klebsiella  
pneumoniae*  
subsp.  
*pneumoniae*  
HS11286\_4-

WP\_004151384.1

ATGAAGACACAGGTCGCGATTATTGGCGCGGGCCCTCCGGGCTGCTGCTGG  
GGCAGTTGCTGCACAACGCCGGGATCCATAACCGTGATCCTTGAGCGTCAAAC  
GCCGAGTATGTGCTGGGGCGCATCCGCGCGGGAATTCTGGAAAGCGGTACC  
GTTGATCTGCTGCGCGAAGCGGGCGTGGCGCAGCGGATGGATGCCGAAGGCC  
TGGTGATCATGGGGTGGAGTTTCTGTTTACGGCCAGCGGGTGCCCGTCGCA



hydroxybenz  
oate 3-  
monooxygena  
se

CTGAGCGAGCTAACCGACGTAAGAGCGTAATGGTTTATGGCCAGACCGAA  
GTCACCCGCGATCTGATGGCTGCCCGGGCCAGCGGCGCGCCGATCGTCT  
ATGGCGTGAGCGAGGTGGCTATCCATGACGCCAAAAGCGACCGGCCGACGA  
TCACCTACCTCAGCGAAGGGGAAACCTGCCGTCTGGAGTGCGATTTTATTGCC  
GGTTGCGACGGTTTCCACGGCGTATCGCGGCAAAGTATTCCAGCTGGCATT  
GCAGACCTACGAGAGCGTGTGGCCGTTTGGCTGGCTAGGCCTGCTGGCGGAT  
ACGCCGCCGGTCAATCCGGAGCTTATTTATGCGCACCATCAGCGGGGGTTTGT  
ATTGTGCAGTCAACGCTCACTGACTCGCAGCCGCTATTATCTGCAGGTCCGC  
TGAGCGATAAGGTTGAAGCATGGTCGGACGAGCGCTTCTGGCAGGAGCTGAA  
AAGCCGCTTGCCGGAGGAGCTGGCATCCAGGTTAGTGACTGGTCACGCACTT  
GAGAAGAGCATTGCCCCCTGCGTAGCTTCGTCTGGAGCCGATGCAATATG  
GGCGTTGTTCTTGGTGGGGATGCGGCGCATATCGTTCCGCCAACCGGGGC  
GAAAGGATTAATCTGGCGGCATCGGACGTGAACTATCTGTGGCGGATTCTG  
CGGAATACTACCATCGTGGCCGAGCGATCTGCTGGCGGCTACTCGCAAC  
TGGCGCTGGATCGGGTCTGGAAAGGGGAAACGCTTTAGCTGGTTTATGACCCG  
CCTGCTGCATGATTTTCCGGATCAGAACGCGTTCGACGCTAAAATGCAGGCC  
GCCGACCGCCGCTACTATCTGGGCTCGCGCGCCGGGCTGACCACCATCGCGG  
AAAACCTACGTGGGCTTGCCCATGGAGCGTGTGCGCTGA

*Klebsiella*  
*pneumoniae*  
subsp.  
*pneumoniae*  
HS11286\_2-  
octaprenyl-6-  
methoxyphen  
yl  
hydroxylase

WP\_002916482.1

ATGAGCGTGCTGATCGTCGGCGGCGGGATGACCGGGGCGACGCTCGCGCTGG  
CCATCTCCCGTTTGACCGGCGGCGCGCTGCCGGTCCACCTCATTGAAGCGCAG  
GATCCGCATTCTTCACGCCACCCTGGCTTTGACGACCGGGCGATCGCCCTGGC  
TGCGGGCACCTGCCAGCAGCTGGCGCGTATCGGTATCTGGCAACGCCTCGCC  
GAACGCGGACGCCATCCAGCGAGTACACGTCAGCGACCGCGGTATGCC  
GGGTTTGTGAATCTGGCGGCCGCGGATTATGGCTGTGCGCGCTGGGCCAGGT  
GGTTGAACTCCACGATGTCGGCCAGCGGCTGTTTGGTCTGCTGCGCGAGGCGC  
CAGGCGTCACGCTGCACTGTCCGGCGAAAGTGGAAGCGGTCAGTCGCAGCCA  
GGAGAGCGTCAGCCTTACGCTTGAGGGCGGCGAAATCATTAAACGGTAAGCTG  
CTGGTGGCGGCGGACGGTTCCCGTTCGGCACTGGGCGCCCGCTGCGGCATCA  
GCTGGCAGCAGCAGCCGATGAGCAGATAGCGATCATTGCTAACGTCAGCAC  
CGCGTTGCCACGAAGGTCGCGCCTTCGAGCGCTTACCAGCATGGCCCCG  
CTGGCGATGCTGCCGATGTGCAAGGGCGCTGCTCGCTGGTGTGGTGTATCC  
GCAGTCGCGCCGCGATGAGGTGCAGAGCTGGTCTGACGAACGCTTTTGTGAG  
GAGCTGCAGCAGGCGTTCCGGCTGGCGGCTGGGGCGTATTACCCACGCCGGGA  
AGCGCAGCGTTTATCCGCTGGCCCTACCACCGCCAGCCGCGCGGTGTGCA  
CCGCTGGCGCTGGTGGCAACGCGGCGCAGACGCTGCACCCGATCGCCGGG  
CAGGGCTTTAATCTCGGCCTGCGCGATGTGATGAGCCTGGCGGAATTACTCGC  
TGACGCCCATCTCAGCGGCGAAGATGTGCGTCAATTATCCACTGCTGTGCCGCT  
ATCAGGCGCGCAGGGCAGGGGATAAAGCCGCCACCATCGGCGTGACCGATG  
GGCTGGTGCATCTGTTTGCCAACCGTTGGGCGCCGCTGGTGGCGGGGCGCAA  
CGTCGGTCTGATGGCGATGGAATTATTTACCCCGGCGCGGATGCGCTGGCGC  
AGCGTACCCTCGGTTGGGTTCCCGTTAA

*Kosakonia*  
*radicincitans*  
DSM 16656\_2-  
octaprenyl-6-  
methoxyphen  
yl  
hydroxylase

WP\_007370239.1

ATGAGTGTGATTATTGTTGGCGGCGGCATGGCCGGTGGCAGCTCGCGCTGGT  
CATTTACATCTGACGCAGGGGAAATTACCGGTTACCTGGTAGAGGCTACA  
GCACCGGGTGTCAACATCATCCTGGTTTTGATGCCCGTGTATTGCGCTGGC  
GGCAGGCACGTGCCAGCAGCTTGGCGCGCTGGGATCTGGCAGGCGATAGCC  
CGTTGTGCAACGCCCATTTCAACCGTTCATGTCAGCGATCGTGGTCACGCCGG  
TTTTGTACGCTGGATGCGCAGGATTATCACCTTGTGCGCTGGGCCAGGTGG  
TTGAGCTGCATGATATCGGCCAGCGGCTCTTTACCTTGCTGCAAAATGCGCCG

GGCGTGACGCTGCATTGCCCGATCGGGTCAGCAGTTTTACCCGTAATGAGC  
AACAGGTATCGGTAACGCTGGAAAGCGGCGAGCTGATTATTGGCCAGTTGCT  
GGTCGCGGGCGGACGGTTCCCGTTCGGGCATGGGCGAGCAACTGGGGATCCTC  
TGGCAGAAAACGCCCTATCACCAGGCCGAGTCATTGCCAACGTCACTACCT  
CTGTTCCGCACCAGGGACGCGCATTGAAACGTTTCACCGAGCACGGGCCGCT  
GGCGATGTTGCCGATGTCGCAGGGGCGCTGCTCACTGGTGTGGTGTGCATCCGC  
TGGAAAAACAGCAGCAGGTGACTGGCTGGTCTGACGAACGTTTTTGGCATGA  
GCTACAAAAAGCTTTCGGCTGGCGTCTGGGACGTATTGAACACGCCGAAAA  
CGCAGCGTTTATCCCCTGATGTTGACTAACGCGTCGTCGCCGTTTCTCATCGC  
GCGGTGCTGGTCGGCAATGCGGCTCAGACGCTGCATCCTATCGCCGGACAAG  
GGTTTAACTCGGCATGCGCGATGTTATGACGCTGGCGGAAACGCTGGCGGA  
GGCATGGGCGAAGCAGAAAGATGTCGGCTGTTATCCGGTGTGACGCGCTAC  
CGTCACCAGCGCCAGGCCGACAAAAGCGCCACCATAGGCGTTACCGACGGG  
CTGGTGCATCTGTTTCCAACCGCTGGGCGCCGCTTGTGCTCGGGCGCAATAT  
CGGGCTGATGGCGATGGAACATTTACCCCGGCGCGCGATGTGCTGGCGCAG  
CGTACCCTCGGTTGGGTAGCCCGTTAA

ATGACACATCACACTGAAGTCGCCGTCGTTGGCGGTGGCATGGTCCGGCGGAG  
CGCTGGCGCTGGGGCTGGCGCAACATGGATTTACCGTTACGGTAATTGAGCA  
GCATGCGCCGCCACGTTTGATGCGACGGCGCAGCCGGATGTGCGTATTTTCG  
GCAATTAGCGCCGCATCGGTGGCGTTGCTGCGCGGGTTGGGTGTCTGGGAAC  
GTGTGCAGGCGATGCGCTGCCACCCGTATCGCCAGCTGGAAACCTGGGAGTG  
GGAAAACGCCCATGTGATATTTGACGCCCGCGAGCTGAAATTGCCGCTGCTC  
GGTTATATGGTTGAAAACAATGTCCTGCAACGTGCGCTGTGGGACGCGCTTG  
AGGCGCATCCGCAGGTCACGTTACGTGTGCCCGCGCACTCAGCGGATTACA  
TACGGATGGTGATCATCACCAACTGACCTTCGAGGAGGGCGAGTCGTTAACG  
GCGAAGCTGGTGGTTGGCGCGGATGGCGCTAACTCCCGCGTTCCGGCAGGCCG  
CCGGAATTGGCATTACGCCTGGCAGTATCAGCAATCCTGTATGTTGATTACC  
GTTGAGTGCGAAGCTGAGGCAGGCGAGAGCACCTGGCAACATTTTACTCCCG  
ATGGGCCCGCACGCCTTTTTACCGCTGTTTGGCAACTGGGCCTCGTTGGTATGG  
TATGACACGCCTGCGCGTATTCGCCAGTTACAGACGCTGACTATGGCGCAGC  
TGGAGCAGGAGATCGTTTCGCAACTTTCTCCCGGACTGGGGCGCGTGAAGCC  
GGTTGCGGGCGGCGGCATTCGCCGCTGGCGCGCCGTATGCGTTGCAATATGTT  
GCCCGGGCCTTGCCTGGTGGGCGATGCGGCACATAACCATTATCCGCTGGC  
CGGGCAGGGCGTCAATCTGGGCTATCGTGATGTTGATGCCTTGTGGAAGTGC  
TTACCGGGGCACGTACGCACGGCGAAGCCTGGGCCAGTCACGCGATTTTAAA  
ACGCTATCAGACGCGTCGAATGGCGGATAACTTTATTATGCAAAGCGGTATG  
GATCTGTTCTATGCCGGTTTCAGCAACAACCTTGGCCCCGGTCAGGTTGTTGCG  
TAATATTGGTCTGATGGCGGCGGAGCGTGCCGGAGTGCTGAAACGTCAGGCG  
CTGAAATATGCTTTAGGACTATAG

ATGACAAATCAACCAATTGAAGTCGTCGTTGTGCGGGGGGCATGGTGGGTG  
CCGCCCGCGCTTGGGCTTGCGAAAATGGCTTTCAGGTCGCCGTCGTGGA  
ACATGCCCGCGCCGCCGCTTTTCACCGCAAACCCGCCGACGTGCGGATC  
TCGTGATCAGTTGCGCGTCCGTTGGATCTGCTGCGCGGGCTGGGCGTCTGGCA  
GCAGGTGCTTGAGATGCGCGCGCATCCTTATCGCCGCCTCGAAACCTGGGAG  
TGGAACGAGGCGCGGGTTGAATTCAGCGCCGATGAACTGCAACTGCCGGAG  
CTGGGCTATATGGTAGAAAACAGCGTGTGCAACGCGCGCTGTGGGAAGCGC  
TGGAGGCGCATCCGGCGGTGCAACTACTGTGCCCGGCGACGCTCACGCAGAT  
GACGCCGTCGCAAAACGGGTATCAGCTCTCGTTACTAATGGCGACACATTA

*Kosakonia  
radicincitans*  
DSM 16656\_2-  
octaprenyl-3-  
methyl-6-  
methoxy-1,4-  
benzoquinol  
hydroxylase

WP\_007373869.1

*Cronobacter  
sakazakii*  
HA18012\_2-  
octaprenyl-3-  
methyl-6-  
methoxy-1,4-  
benzoquinol  
hydroxylase

WP\_166492126.1

|                                                                                                                                               |                       |                                                                                                                                                                                                                                                                                                                                                                                                                                                                                                                                                                                                                                                                                                                                                                                                                                                                                                                                                                                                                                                                                                                                                                                                                                                                                                                                                                                                                                                                                                                                                                                                                                                                                                                                                                                                                                                                                                                                                                                                                                                                                                                                                                                                                                                                                                                                                                                                                                                                                                                                                                                                                                                                                                                                                                                             |
|-----------------------------------------------------------------------------------------------------------------------------------------------|-----------------------|---------------------------------------------------------------------------------------------------------------------------------------------------------------------------------------------------------------------------------------------------------------------------------------------------------------------------------------------------------------------------------------------------------------------------------------------------------------------------------------------------------------------------------------------------------------------------------------------------------------------------------------------------------------------------------------------------------------------------------------------------------------------------------------------------------------------------------------------------------------------------------------------------------------------------------------------------------------------------------------------------------------------------------------------------------------------------------------------------------------------------------------------------------------------------------------------------------------------------------------------------------------------------------------------------------------------------------------------------------------------------------------------------------------------------------------------------------------------------------------------------------------------------------------------------------------------------------------------------------------------------------------------------------------------------------------------------------------------------------------------------------------------------------------------------------------------------------------------------------------------------------------------------------------------------------------------------------------------------------------------------------------------------------------------------------------------------------------------------------------------------------------------------------------------------------------------------------------------------------------------------------------------------------------------------------------------------------------------------------------------------------------------------------------------------------------------------------------------------------------------------------------------------------------------------------------------------------------------------------------------------------------------------------------------------------------------------------------------------------------------------------------------------------------------|
| <p><i>Cronobacter sakazakii</i><br/>487G_alkane 1-<br/>monooxygenase</p>                                                                      | <p>WP_105944427.1</p> | <p>CAGGCGCGCCTGGTGATCGGTGCGGACGGTGCCAGCTCGCAGGTACGTAAAT<br/>GGGCAGGTATCGGCGTTAACGCCTGGCAGTATCAGCAGTCATGCCTGTTGATT<br/>AGCGTGGAATGCGAGCAGCCGCCGGCGACAGCACCTGGCAGCACTTTACCC<br/>CGAACGGGCCGCATGCGTTTTTACC GTTTGATAACCGTGCGTTCGCTCGTC<br/>TGGTATGACCGCCCGGCACGTGTTTCGTCAGCTTCAGGCGATGACCATGACAC<br/>AGCTTGGGCGAGAGATTGCCGCCGCAATTCCTGCCCGCTTGGCCGCGTGAC<br/>GCCGTCGCCTGCGGCGCGTTTTCCGCTGGTGCCTCGCCATGCGCTGCGTTATG<br/>TGCAGCCGGGCGTTCGCGCTAATTGGCGACGCCGCGCATAACCATCATCCGTT<br/>GGCGGGGACAGGGGGTGAATCTCGGTTATCGCGATGTGGACGCGCTGCTGAAG<br/>GTGGTGATTGATGCCCGCAATGCGGGCGGAAGACTGGGCTTCCGGCGCGGTGC<br/>TTAAGCGCTATCAGCGTTCGTCGATGCCGGATAACCTGCTGATGCAAAGCGG<br/>TATGGATCTTTTCCATGCCGGGTTTACTGCGAAACTGAAACCGCTGCGCGTGC<br/>TGCGCAATCTTGGGCTTATCGCCGCCAGCGCTCAGGCGTGCTGAAACGCCA<br/>GGCGCTGCGGTATGCGCTCGGTTTATGA<br/>ATGCGCTGCCCGCAGGCGTTCGCGCCGCGCATTATGGCCTCGCGCACCCGCTTT<br/>TGTGACGGATAACAGTGACGACGCCCGCCGCTTCGCGCAAACCGGGCTGGCG<br/>GCTCAGGCCGCGCAGTTCCGCGCGCAGGGCCACCGGCTTACGGGCGAGACG<br/>CTGGAAGATTATATCGCCCGGTTTCGATGTGCATCTCGGCACCCCGCGGGAAA<br/>CGCTCGCCACGCTGTCGCGCGATAACGGCGCTCGCACGCGCCACCGATCTGTC<br/>GTTCCAGGTGCATTCCATCGATCCGCCGACCCGTTTATCTTGCCTCCATCTC<br/>ACTGCTGGCGCAGCAGGTGGCCCCCGCGCTTGGCTGGAAACAGGCCGACCCG<br/>GGCGCTGATGCCTCCACCCTTAACCCGATCAAGGAAACCTTATGA<br/>ATGACAAATCAACCAACGGAATGCCATTGTGCGCGGAGGAATGGTCCGGC<br/>GGCGACTGGCGCTGGGGCTGGCACAGCACGGATTTGCGGTAACGGTGATCG<br/>AGCACGCAGAACCTGCACCGTTTGTGCTGACAGCCAGCCTGACGTGCGGAT<br/>CTCGGCGATTAGTGGGCTTCGGTATCATTGCTTAAAGGTTTAGGCATCTGGG<br/>ACGCGGTACAGGCTATGCGTTGCCATCCTTACCGCAGACTGGAAACGTGGGA<br/>GTGGAAACGGCGCATGTGGTGTGTTGACGCCGCTGAACTTAAAGTACCGTTG<br/>CTTGGCTACATGGTGGAAAACACTGTCCTGCAACAGGCGCTGTGGCAGGCGC<br/>TGGAAGCGCATCCGAAAGTAAACGTTACGTGTGCCAGGCTCGCTGATTGCATT<br/>ACATCGAGATAATGATCTTCAGGAGCTGGAGCTGAAAGGCGGTGAAGTGATC<br/>CAGGCCAAGCTGGTGATTGGCGCTGACGGTGCAAATTCGCAGGTGCGGCAA<br/>TGGCGGGAATTGGCGTTCATGCCTGGCAGTATGCGCAGTCGTGTATGTTGATT<br/>AGCGTACAGTGCAGAAATGATCCCGGCGACAGCACCTGGCAGCAGTTTACTC<br/>CGGACGGGCGCGTGCCTTTTTGCCGCTGTTGATAACTGGGCGTTCGCTGGTG<br/>TGGTATGACTCTCCGGCGCGTATTCGCCAGTTGCAGAATATGAATATGGCGCA<br/>GCTCCAGGCGGAAATCGCGAAGCATTTCGCCGTCGCGTCTGGGTTACGTGACA<br/>CCGCTTGCCGCTGGTGCCTTTCCGCTGACACGTGCCATGCGTTGACGATGATG<br/>GCAACCAGGGCTTACGCTGGTGGGCGATGCCGCGCACACCATTATCCGTTG<br/>GCGGGGACAGGGGTTAACCTCGGTTATCGCGATGTTGATGCGCTGATTGACGT<br/>TCTGGTGAATGCCCCGAGCTACGGTGAAGCGTGGGCCAGTTATCCTGTCTCA<br/>AGCGTTACCAGATGCGGCGTATGGCGGATAACTTCATTATGCAAAGCGGTAT<br/>GGATTGTTTTATGCCGGATTCAGCAATAATCTGCCACCCTGCGTTTTATGCG<br/>TAATCTCGGATTAATGGCGGCGGAGCGTGCTGGCGTGTGAAACGTCAGGCC<br/>CTGAAATATGCGTTAGGGTTGTAG<br/>ATGGCAATACAACACCCTGACATCCAGCCTGCTGTTAACCATAGCGTTCAGG<br/>TGGCGATCGTGGTGCCGGTCCGGTCCGGCTGATGATGGCGAACTATCTCGG<br/>CCAGATGGGCATTGACGTGCTGGTGGTGGAGAACTCGATAAGTTGATCGAC</p> |
| <p><i>Klebsiella oxytoca</i><br/>2880STDY568<br/>2666_2-<br/>octaprenyl-3-<br/>methyl-6-<br/>methoxy-1,4-<br/>benzoquinol<br/>hydroxylase</p> | <p>WP_022645356.1</p> | <p>AGCGTACAGTGCAGAAATGATCCCGGCGACAGCACCTGGCAGCAGTTTACTC<br/>CGGACGGGCGCGTGCCTTTTTGCCGCTGTTGATAACTGGGCGTTCGCTGGTG<br/>TGGTATGACTCTCCGGCGCGTATTCGCCAGTTGCAGAATATGAATATGGCGCA<br/>GCTCCAGGCGGAAATCGCGAAGCATTTCGCCGTCGCGTCTGGGTTACGTGACA<br/>CCGCTTGCCGCTGGTGCCTTTCCGCTGACACGTGCCATGCGTTGACGATGATG<br/>GCAACCAGGGCTTACGCTGGTGGGCGATGCCGCGCACACCATTATCCGTTG<br/>GCGGGGACAGGGGTTAACCTCGGTTATCGCGATGTTGATGCGCTGATTGACGT<br/>TCTGGTGAATGCCCCGAGCTACGGTGAAGCGTGGGCCAGTTATCCTGTCTCA<br/>AGCGTTACCAGATGCGGCGTATGGCGGATAACTTCATTATGCAAAGCGGTAT<br/>GGATTGTTTTATGCCGGATTCAGCAATAATCTGCCACCCTGCGTTTTATGCG<br/>TAATCTCGGATTAATGGCGGCGGAGCGTGCTGGCGTGTGAAACGTCAGGCC<br/>CTGAAATATGCGTTAGGGTTGTAG<br/>ATGGCAATACAACACCCTGACATCCAGCCTGCTGTTAACCATAGCGTTCAGG<br/>TGGCGATCGTGGTGCCGGTCCGGTCCGGCTGATGATGGCGAACTATCTCGG<br/>CCAGATGGGCATTGACGTGCTGGTGGTGGAGAACTCGATAAGTTGATCGAC</p>                                                                                                                                                                                                                                                                                                                                                                                                                                                                                                                                                                                                                                                                                                                                                                                                                                                                                                                                                                                                                                                                                                                                                                                                                                                                                                                                                                                                                                                                                                                                                                                                                                                                                                                                                                                                                                                                                                                               |
| <p><i>Klebsiella oxytoca</i><br/>2880STDY568</p>                                                                                              | <p>WP_001577817.1</p> | <p>ATGGCAATACAACACCCTGACATCCAGCCTGCTGTTAACCATAGCGTTCAGG<br/>TGGCGATCGTGGTGCCGGTCCGGTCCGGCTGATGATGGCGAACTATCTCGG<br/>CCAGATGGGCATTGACGTGCTGGTGGTGGAGAACTCGATAAGTTGATCGAC</p>                                                                                                                                                                                                                                                                                                                                                                                                                                                                                                                                                                                                                                                                                                                                                                                                                                                                                                                                                                                                                                                                                                                                                                                                                                                                                                                                                                                                                                                                                                                                                                                                                                                                                                                                                                                                                                                                                                                                                                                                                                                                                                                                                                                                                                                                                                                                                                                                                                                                                                                                                                                                                 |

2666\_bifuncti  
onal 3-(3-  
hydroxy-  
phenyl)propi  
onate/3-  
hydroxycinna  
mic acid  
hydroxylase

TACCCGCGTGCGATTGGTATTGATGACGAGGCGCTGCGCACCATGCAGTCGG  
TTGGCCTGGTCGATAATGTTCTGCCGCACACTACGCCGTGGCACGCGATGCGT  
TTTCTCACCCCAAAGGTCGCTGTTTTGCTGATATTCAGCCAATGACCGATGA  
ATTTGGCTGGCCGCGCCGTAACGCCTTTATTCAGCCTCAGGTCGATGCGGTAA  
TGCTGGAAGGATTGTCGCGTTTTCCGAATGTGCGCTGCCTGTTTTCCCGCGAG  
CTGGAGGCCTTCAGCCAGCAAGATGACGAAGTGACCGTGCACCTGAAAACG  
GCAGAAGGGCAGCGGAAACGGTCAAAGCCCAGTGGCTGGTGGCCTGTGAT  
GGTGGGGCAAGTTTTGTCCGTGCGACCCTGAATGTGCCGTTTGAAGGTAAAAC  
TGCGCAAATCAGTGGATTGTGGTAGATATCGCAAACGATCCGTTAAGTACG  
CCGCATATCTATTTGTGTTGTGATCCGGTGCGCCCGTATGTTTCTGCCGCGCTG  
CCTCATGCGGTACGTCGCTTTGAATTTATGGTGATGCCGGGAGAAACCGAAG  
AACAGCTGCGTGAGCCGCAAATATGCGCAAGCTGTTAAGCAAAGTGCTGCC  
TAATCCGGACAATGTTGAATTGATTTCGCCAGCGTGTCTACACCACAACGCG  
CGACTGGCGCAACGTTTTTCGTATTGATCGCGTACTGCTGGCGGGCGATGCCGC  
GCACATCATGCCGGTGTGGCAGGGGCAGGGCTATAACAGTGGTATGCGCGAC  
GCCTTTAACCTCGCATGGAAACTGGCGTTGGTTATCCAGGGGAAAGCCCCGCG  
ATGCGCTGCTCGATACCTATCAACAAGAACGTCGCGATCACGCCAAAGCGAT  
GATTGACCTGTCCGTGACGGCGGGCAACGTGCTGGCTCCGCCGAAACGCTGG  
CAGGGTACGTTACGTGACGGCGTTTCTGGCTGCTGAATTATCTGCCGCCAGT  
AAAACGCTACTTCTCGAAATGCGCTTCAAGCCGATGCCGCAATATTACGGC  
GGTGGCGCTGGTGGCGTGAAGGGCAAGCGAAGCACTCTCCGGTCGGCAAGATGT  
TTATTCAGCCGAAAGTCACGCTGGAAAACGGCGACGTGACGCTGCTCGATAA  
CGCGATCGGCGCGAACTTCGCGGTAATTGGCTGGGGATGCAATCCACTGTGG  
GGGATGAGCGACGAGCAAATCCAGCAGTGGCGCGCGTTGGGCACACGCTTC  
ATTCAGGTGGTGCCGGAAGTGCAAATTCATACCGCACAGGATAACCACGACG  
GCGTACTACGCGTGGGGGATACGCAAGGTCGCCTGCGTAGCTGGTTTCGCGCA  
ACACAATGCTTCGCTGGTGGTGATGCGCCCCGATCGCTTTGTGCGCCACCG  
CCATTCCGCAAACCTGGGCAAGACCCTGAATAAACTGGCGTCCGTGATGAC  
GCTGACCCGCCCTGATGCCGACGTTTCTGTGCGAAAAGGTAGCCTGA  
ATGGCAAAGTGATGCGAGCAATCATTGTGCGCGGCGGTATTGGCGGGGCGAG  
CCACGGCGCTTTCGCTGGCGCGCCAGGGTATCAAGGTGATGCTGCTGGAAAA  
GGCGCATGAAATCGGCGAAATTGGCGCCGGGATCCAGCTTGGCCCAAACGC  
GTTCTCGGCGCTGGACAGCCTCGGCGTCGGCGAAGTCGCCCGTCAGCGGGCG  
GTCTTTACCGACCATATCACCATGATGGATGCGATAAACGGCGAAGAGGTGCG  
TGCACATTGAGACAGGACAGGCGTTCCGCGACCATTTTGGCGGGCCGATGCG  
GGTATCCACCGGGTGGATATCCATGCCACCGTCTGGGAGGCGGCGCTGACC  
CATCCGGCCGTCGAGTATCGTACTTCGACGCAGGTAGTGGATATCCGCCAGA  
CCGCCGATGACGTGACGGTGTGTTGATGATAAAGGCAATAGCTGGACGGCGGA  
TATTCTGATCGGCTGCGACGGCGGTAATCGGTGGTGCGCCAAAGCCTGCTG  
GGCGATTCGCCGCGGGTAACCGGCCACGTGGTCTATCGCGCGGTCTGTCGATG  
CCGCCGATATGCCGGACGATTTACGCATCAATGCGCCGTAAGTGGGGCGGG  
TCCGCACTGCCACCTGGTGCAATATCCGCTGCGCGGGCGTAAGCAGTACAAC  
CTGGTGGTGACCTTTCATAGTCCGCAGCAGGAAGAGTGGGGCGTGCGCGACG  
GCAGTAAAGAAGAGGTGCTCTCCTACTTTAAAGGTATCCACCCGCGTCCCCG  
GCAGATGCTCGATAAACCGACCTCCTGGCGCCGCTGGTCCACCGCCGATCGC  
GAGCCGGTAGAAAAATGGGGCAACGATCGTATTACGCTGGTCCGGCGATGCCG  
CGCATCCGGTGGCGCAGTATATGGCGCAGGGGGCCTGTATGGCGCTGGAAGA  
TGCGGTGACCCTGGGTAAAGCGCTGGCCAGTGGCGACGGCGACGCCGCCCGC

*Klebsiella*  
*oxytoca*  
2880STDY568  
2666\_3-  
hydroxybenz  
oate 6-  
monooxygena  
se

WP\_032728552.1

*Klebsiella*  
*oxytoca* BRL6-  
2\_4-  
hydroxybenz WP\_024273698.1  
oate 3-  
monoxygena  
se

GCTTTCGCGCTGTATGAATCGGTGCGTATTCCGCGTACCGCGCGGATCGTCTG  
GTCGACGCGTGAAATGGGGCGGGTCTATCACGCTGCCGGGGTTGAGCGCCAG  
GTGCGCAATCTGCTGTGAAAGGCAAAACCCAGAGCGAGTTTTATCGCGGCA  
TTGAGTGGCTGTACGGCTGGAAAGAGGGTAACTGCCTGCAACCACGTAA  
ATGAAAACACAGGTGGCGATTATCGGGGCTGGCCCATCCGGACTCCTGCTGG  
GGCAGTTGTTACATCACGCCGGATTCAAACCGTCATCCTTGAGCGACAGAC  
TCCTGAGTACGTGCTGGGGAGGATCCGCGCGGGCATTCTGGAAAGCGGAACG  
GTAGAGCTGCTGCGCGAAGCCGGCGCCGCCCGCGAATGGAGGCTGAAGGC  
CTGGTGCATCATGGCGTCGAATTTTTGTTGAGGGCAAGCGGGTACCGGTTGC  
GCTGACGGAAGTACGGCGGGCAAAAGCGTGATGGTTTATGGCCAGACTGA  
AGTGACGCGGGATTGATGGCCGCGCGGGCGGAATGCGGGGCGGCGACGAT  
TTATGGCGTCAGCGAAGTCACTATTAATGAGGCAAAGAGCGATCGACCATCG  
GTCTCTTTTATCAGCAATGGCGAACACTGCCGCTTAGAGTGCAGCTTTATCGC  
CGGCTGCGATGGCTTTCACGGCGTGTCCCGTCAAAGTATTCTCCTGGGGTGC  
TGAAAGAGTACGAAAGCGTCTGGCCGTTTGGCTGGCTGGGGCTGCTGGCCGA  
TACGCCGCCGGTGAACCCGGAGCTTATTTACGCGCACACGAACGCGGGTTT  
GTTCTTTGTAGTCAGCGCTCACTAACTCGAAGCCGTTATTACCTCCAGGTCCC  
GCTCAGTGAAAAGGTTGAGGCATGGTCTGATGAGCGTTTCTGGAATGAACTC  
AAACGCCGCCTCCCTGAAGAGCTGTCCAGCAAGTTAGTGATTGGTCACTCAC  
TCGAGAAGAGCATCGCGCCGCTGCGCAGCTATGTGGTGGAGCCGATGCAGTA  
CGGCAGATTGTTTCTGGTGGGGGATGCGGCGCATATCGTACCGCCTACCGGG  
GCAAAAGGATTGAATCTCGCGGCGTCCGATGTGAACTATTTATGGCGCATCCT  
CCGTGAATATTATCACCATGGTTCGCGTTGACCTGCTGGCGAGCTACTCTCGTT  
TTGCGCTGGATAGGGTATGGAAAGGCGAAAGATTGAGCTGGTTTATGACCCG  
TCTGCTGCATGATTTCCCGCAACAAAGCGAGTTGATAGAAAAATGCAGGCG  
GCGGATCGGCGTTATTATCTTGGCTCACGCGCCGGATTAACCACGATCGCTGA  
AAACTATGTCGGTTTTGCCGATGGAGCGCGTGGCATAA  
ATGAGCGTGATTATCGTGGGCGGCGGCATGGTTCGGCGGACGCTGGCGCTGG  
CTATTTTCGCAACTCAGTCATGGGACGCTGCCGGTACATCTGATTGAAGCGACG  
GCGCCGGAGGCCGATGGCCACCCCGGATTCGACGCCCGGGCGATAGCGCTG  
GCAGCAGGTACCTGCCAGCAACTGGCGCGAATAGGCGTGTGGCAGGCCATTG  
CCGACTGCGCGACCGCTATCACGAGCGTTCACGTACGCGATCGCGGTCATGC  
CGGCTTTGTTACCTTACGCTGAGGACTATCGTCTCCCGCGCTGGGGCAGG  
TGGTTGAACTGCACGACGTAGGGCTGCGGCTTTTTGCCCTGTTGCGCAAAGCG  
TCTGGCGTTACGCTGCACTGCCCAGGATCGGGTCGCCAGCGTATCGCGCACGG  
CGGAGCAGGTGAGCGTGACGCTGAAAAACGGTCAGACGGTTACCGGTAGCC  
TGCTGGTTGCCGCCGACGGCACGCGTTCAGCGCTGGCAAGCGCGTGTGGCGT  
TGAGTGGCAGCAGGAACCGTATGAGCAACTGGCGGTGATAGCGAACGTCGC  
CACGTCTCTTTCGCGATGACGGCCGCGCCTTTGAACGCTTTACCGCGCATGGTC  
CGCTGGCGATGCTGCCCATGTCTGAAGGCCGCTGTTTCGCTGGTGTGGTGTAC  
CCGCTGGAAAAGCGCGACGAGATTCTGGCCTGGTCAGACGAACGTTTTTGGC  
GCGAACTGCAGACAGCATTCCGGCTGGCGGCTTGGCCGGATCACGCTGGCGGG  
CAAACGTAATGCTTATCCGCTTTCGCTTACTACGGCGGCGAAAGCGTTTACCC  
ATCGCACCGTACTGGTGGGCAATGCGGCGCAGACGCTGCATCCAATCGCCGG  
ACAAGGGTTTAACTCGGGCTGCGCGATGTGATGAGTCTTGTGAAACCTG  
ACGCAGGCGCAGTCTGTGGGGCAGGATATCGGCGATTACAATGTGCTTTCCG  
CCTATCAGCAGCGCCGCGCAAGACCGGAACGCCACGGTTCGGCGTGACCG  
ACGGCATGGTGCATCTGTTTGCCAATCGCTGGATAACCGCTGGTGGTTGGGCGC

*Citrobacter*  
*sedlakii* NBRC  
105722\_2-  
octaprenyl-6- WP\_042292169.1  
methoxyphen  
yl  
hydroxylase

*Citrobacter  
sedlakii* NBRC  
105722\_2-  
octaprenyl-3-  
methyl-6-  
methoxy-1,4-  
benzoquinol  
hydroxylase

WP\_042285453.1

AACGTCGGGTTAATGGCTATGGAGCTGTTTCCACCCGCCCGTGACGCTCTGGT  
GAAGCGCACGCTTGGCTGGGTTGCGCGATAA  
ATGACAAATCAACCAACGGAAGTGGCCATTGTCCGGCGGAGGGATGGTCCGC  
GGTGCCTGGCGCTGGGACTGGCGCAGCACGGATTTACGGTCACGGTGATTG  
AACACGCCGCGCCAGCGCCCTTTGCGGCGGACAGCCGGCCCGACGTGCGTAT  
TTCCGCGATCAGCGCCGCGTCTGTTTCGCTGTTGAAAAGCCTGGGCGTCTGGG  
ATGCGGTACAAGGGATGCGCAGCCATCCTTATCGTCCGGCTGGAAACCTGGGA  
ATGGGAAAATGCCACGTTGTTTTGACGCTGCGGAACTGAAGCTGCCGCTG  
CTGGGCTATATGGTCGAGAACACTGTTTTGCAGCAGGCGCTGTGGCAGGCGC  
TGGAGGCGCATCCGAACGTTACCCTGCGAGTCCCAGCGTCCGTTGCGGCGCT  
ACATCGTCATCACGACAGTCAGGTAAGTGGAGCTGGCAGATGGCGAGCAGATT  
ATGGCGAAGCTGGTGGTCCGGCGCTGACGGCGCGAATTACAGGTGCGCCAAC  
TGGCTGGCATTGGCATTACGCCTGGCAGTATGCGCAGTCATGCATGCTGATC  
AGCGTTCAGTGCGAACAGGCGCCGGGGACAGCACCTGGCAGCAGTTTACG  
CCGGATGGCCCGCGCGCTTTTTGCCGCTCTTTGATCGCTGGGCGTCCGCTGGT  
GTGGTATGACGCGCCAGCGCGTATTGCCAGTTGCAGACCCTGAGCATGCCG  
CAGTTGCAGGCGGAAATCGTAAAACATTTCCCGGCGCGGCTGGGGCCGGTGA  
CGCCGCTGGCCGAGGTGCGTTCCCGCTGACCCGTCGACACGCGTTGCAGTA  
TGTTACGCCGGCCTGGCGCTGGTTGGCGATGCGGCGCACACCATTATCCGC  
TGGCCGGGCAGGGGGTGAACCTCGGCTATCGCGATGTCCGATGCGCTGATCGA  
TGTGCTGGTAAATGCGCGCAGCTATGGAGAACGTTGGGCCAGCCAGCCGGTG  
TTGAAGCGCTACCAAATGCGGCGCATGGCGGATAACTTTATGATGCAGAGTG  
GAATGGATCTGTTTTACGCTGGATTACAGTAATAACCTGCCGCCGCTGCGTATG  
CTGCGCAACCTCGGCCTGATGGCTGCTGAACGTGCGGGTGTGTTAAACGCC  
AGGCGCTGAAGTATGCGTTAGGGTTGTAA  
ATGGCTAAAGTGAAGAGCGCAATTATCGTTGGCGGCGGCATTGGCGGGGCGAG  
CAACCGCGCTTTCGCTGGCGCGCCAGGGTATCAAGGTGATGCTGCTGGAAAA  
GGCGCACGAGATTGGCGAGATTGGCGCAGGCATCCAGCTTGGCCCAAATGCC  
TTTTCCGGCGCTGGACAGCCTCGGTGTTGGCGACGTAGCGCGCCAGCGGGCGG  
TATTTACCGACCATATCACCATGATGGATGCGGTAACCGCGGAGGAAGTTGT  
CCGCATTGAAACCGGCCAGGCGTTTTCCGCGACCATTTCCGGCGGGCCGTATGCC  
GTGATTCACCGCGTCGACATTCATGCCTCGGTCTGGGAAGCGGTGCTGACCCA  
TCCTGATGTTGAATACCGGACATCCACCAATGTGGTGGATATTCGCCAGACGC  
CGGACGACGTCACGGTATTTGATGAGCAGGAAACAGCTGGACAGCCGATA  
TTCTGGTGGGCTGTGACGGCGTGAAGTCGGTTGTGCGCCAGAGTCTGCTGGGG  
GATTCGCCCGGGTGACCGGACATGTGGTCTACCGGGCGGTGATTGACTGTG  
ACGATATGCCGGAAGATTTGCGCATTAAACCGCGCCGGTACTGTGGGCGGGGCC  
GCACTGTCACCTTGTCACTATCCGCTACGCGGCGGCAAGCAGTACAACCTG  
GTGGTGACGTTCCATAGCCGTCAGCAGGAGGAGTGGGGGTGAAGGACGGC  
AGTAAAGAAGAGGTGCTCTCGTATTTTCCCGGTATCCATCCTCGTCCACGTCA  
GATGCTCGACAAACCCACCTCCTGGCGTCGCTGGTCCACCGCCGATCGCGAA  
CCGGTGGAAAAATGGGGAACGGAGCGCATTACGCTGGTCCGGTACGCCGCG  
CACCCGGTCGCGCAGTATATGGCCCAGGGCGCATGCATGGCGCTGGAAGATG  
CGGTGACCCTCGGCAAAGCGCTGGAAAAATGCGAGGGCGATGCGGCAAGCG  
CCTTTGCGCTGTATGAGTCGGTGCGCATTCGCGCACGGCGCGAATTGTCTGG  
TCGACCCGCGAAATGGGGCGCGTCTACCACGCTGCGGGCGTCAACGTCAGG  
TGCGTAATCTGCTGTGGAAAGGCAAATCGCAGGCGGAATTTTATCGCGGCAT  
GGAGTGGTTATACGGCTGGAAAGAGGATAACTGTCTGCTGCCGCGCTAG

*Citrobacter  
sedlakii* NBRC  
105722\_3-  
hydroxybenz  
oate 6-  
monooxygena  
se

WP\_042284472.1

|                                                                                                                                  |                       |                                                                                                                                                                                                                                                                                                                                                                                                                                                                                                                                                                                                                                                                                                                                                                                                                                                                                                                                                                                                                                                                                                                                                                                                                                                                                                                                                                                                                                                                                                                                                                                                                                                                                                                                                                                                                                                             |
|----------------------------------------------------------------------------------------------------------------------------------|-----------------------|-------------------------------------------------------------------------------------------------------------------------------------------------------------------------------------------------------------------------------------------------------------------------------------------------------------------------------------------------------------------------------------------------------------------------------------------------------------------------------------------------------------------------------------------------------------------------------------------------------------------------------------------------------------------------------------------------------------------------------------------------------------------------------------------------------------------------------------------------------------------------------------------------------------------------------------------------------------------------------------------------------------------------------------------------------------------------------------------------------------------------------------------------------------------------------------------------------------------------------------------------------------------------------------------------------------------------------------------------------------------------------------------------------------------------------------------------------------------------------------------------------------------------------------------------------------------------------------------------------------------------------------------------------------------------------------------------------------------------------------------------------------------------------------------------------------------------------------------------------------|
| <p><i>Alcaligenes sp.</i><br/>Strain<br/>HPC1271<br/>_aromatic-<br/>ring-<br/>hydroxylating<br/>dioxygenase<br/>subunit beta</p> | <p>WP_009463815.1</p> | <p>ATGAGCGAAATCAGCCGTCAGGCCCTTATCGATTTTGTGTATGCGGAAGCCC<br/>GCCTGCTGGATGAGCAGCGCTACGAGCAATGGCTCGACCTGTTACCCGAGGA<br/>TGGCTACTACTGGATGCCGCTGGTGCACGATCAGCAGGACGCCCGTTGCAC<br/>GCGTCCCTGATGCACGAGGACAAGCTCTTGCTGCGTATCCGTGTGGAACGTCT<br/>GGCAGGCCGCCGTACCTTTTCCAGCAGCCCAAGAGCCGCAGCCATCACCTG<br/>CTCCAGCAACCCACTGTGGAAAGCATGGACGAGGAAAAAGGCCAATACACC<br/>GTGCGTTGCGCCTTCCATTACACGGAAACGCGTGGCGACAACCAAGATATCT<br/>ATGTGGGTTGGAATACCTACACCCTGGTGCGCCAGGACGACGCCTTGAAGAT<br/>CCGTCTGAAACGGGTGGATCTGCTCAATTGCGACGCGCCTTTCGGCAATATCC<br/>AGTTGTTTATGTGA<br/>ATGACATCCAAGGTTTATATCGGCCTGCAAGACAACGACATGTCGCGCTACA<br/>TCGTGAGGCCATCGAGGAAGACAACCCGACGCGACGGTGATTTATCAGCC<br/>AGCCATGATCCGTATTGAGTGTGTGGGTCAGTTGACCGTCAAGCGCGAGACC<br/>GTGGAAGAAAAGTATGGGCAGCAATGGGACATGCAGGAGCTGCATCTGAAT<br/>CTGATCACCTTGGGTGGCAACGTGGATGAAGATGAGGACCGCTTGTTTTTGCA<br/>CTGGAACAGCTAA</p>                                                                                                                                                                                                                                                                                                                                                                                                                                                                                                                                                                                                                                                                                                                                                                                                                                                                                                                                                                                          |
| <p><i>Alcaligenes sp.</i><br/>Strain<br/>HPC1271_mo<br/>nooxygenase</p>                                                          | <p>WP_003800437.1</p> | <p>ATGTCAGACACGAGCTTGCCCACTTTGACAAAGTACGTACGCGTACGCAGTC<br/>CGGCCAACGCCGTTTTGTGGAATTTGATTTTGCCATCGGCCAGCCGGACCTG<br/>TTTGTGGAAGTGGTTCATGCCCCGGCGGCGTTTGTGAGCAGTTTTGTCTGAAAA<br/>CAATGTCCAGCCCATGAGCGATGAGCAAATGCGGGTCAATGACGAGAACGA<br/>AGAGAAATGGCGTTTTGGTTATGACACTTTGGTTCGGCAACAGTTCGTCAGGCTG<br/>AAGCCCAGTAG<br/>ATGGCAGTTACTGCAATTACCCCGGACTACCAAGGCTATGCGCGCGACCAGC<br/>AGTCGACTATGGCGACAGCATGTTGCTGTATATAGGCTGGGACGAGCACCT<br/>TTTGTCTGCTCGGCCAAGGCCTTTCTGGTTCAGCCCGAGATGACCGTGTCCC<br/>AGATGATCCAGCAACTGTTGCCCTGCCGTTTTTGGCCAGCACCTGACTTCGAG<br/>CAGATCGAATGGAGCAAGGTGCAATGGAATTTGAACGGCGAGGCGGTTGAA<br/>CTGAATCCTGACGACACCTTGGGTTCCAAGGGCTTCGATCACAATCCTTGT<br/>GCGTTTCAAGACCCCTGGCCTGAATGGCTACAAGGGTACGGGCGTATAA<br/>ATGTTTGGCGATTTTGTCTTTCGCTCACCTATGCAGCTTATGCCCCGTTCTCGT<br/>CAGGGGCCGCTTTGGTTTGGGATGCGGATTTCTGCGGTGGGGCGTGGTTAGT<br/>TCATAGGCACAGCGATGTACAAGCCGCCCTGCGCAATCCCGATTTAAGTGTG<br/>CGGCGTGTGGCGGGTGGGTGGCCAGGCTGGCGCTGACCCCTCCCCTCGTCT<br/>GCAAGCCTTCAAGGGCTTGATGGCCAGGACGCTGGTCTTTCTGGACCGCCCC<br/>CGTCACACACGCGTCAGACGAGTAGTGAACGCGGCTTTTGTGCGAAGGCTT<br/>TGGAACCCTGCACAGCACGATTGAAAAGCGCGTTACGCATATCCACCTGGA<br/>GTTAAAAGACAAGCTGCGGCACGGTTCAGTGGATCTGGTTGATGAGGTCGT<br/>CGCCCCTCCCCGCTTGGTTCATGATGGACGTGCTCGGCTTGGAGCAACTGCC<br/>TTTGTCTGTTTTTTCAGGCCTGGTTCAGAGCAACTGGCAGGTTTTATCGGACAAG<br/>CCACGCCGGATATGCCTTTGCTGAGAAGCACCCAGGACGCCTTGCTGGATAT<br/>GGCTGACTTTCTAGGCAACAGTGCCAATCTGCAAGAAGGCGGGTTGGCCTGG<br/>CGGCTTTTGCATGATGAGCAGCTTTCCCTTCAAGGCAGGCGCGAGCGCTTGGC<br/>ACAGTCCTGTATGTTGCTCTTTGCAAGGCTATGAAACCTCCCGGCATCTGCTTA<br/>GCTCCCTGTTTCAAACACTGCTGGCCGACTCCACAACGCTGCAGGACTTGCTA<br/>TCGAATCCGCAGAAAATTCCTGCCGCGATCAAAGAGGTGCTGCGTCACGACA<br/>GCCCGATTGAGTACACAGCCAGACGTTTGTGCGCGACCAGCACTGGCATGG<br/>TCAGCATTGCGCAAGGGGCAGTTGCTGCTTTTGTCTTTGGGCGCTGCCAAC<br/>CGGATCCGGCGGTGTTTGGCAATCCCGACGATCTGGACTTCAGCCGCAACAA</p> |
| <p><i>Alcaligenes sp.</i><br/>Strain<br/>HPC1271_phe<br/>nol 2-<br/>monooxygenase</p>                                            | <p>WP_009454452.1</p> | <p>ATGTCAGACACGAGCTTGCCCACTTTGACAAAGTACGTACGCGTACGCAGTC<br/>CGGCCAACGCCGTTTTGTGGAATTTGATTTTGCCATCGGCCAGCCGGACCTG<br/>TTTGTGGAAGTGGTTCATGCCCCGGCGGCGTTTGTGAGCAGTTTTGTCTGAAAA<br/>CAATGTCCAGCCCATGAGCGATGAGCAAATGCGGGTCAATGACGAGAACGA<br/>AGAGAAATGGCGTTTTGGTTATGACACTTTGGTTCGGCAACAGTTCGTCAGGCTG<br/>AAGCCCAGTAG<br/>ATGGCAGTTACTGCAATTACCCCGGACTACCAAGGCTATGCGCGCGACCAGC<br/>AGTCGACTATGGCGACAGCATGTTGCTGTATATAGGCTGGGACGAGCACCT<br/>TTTGTCTGCTCGGCCAAGGCCTTTCTGGTTCAGCCCGAGATGACCGTGTCCC<br/>AGATGATCCAGCAACTGTTGCCCTGCCGTTTTTGGCCAGCACCTGACTTCGAG<br/>CAGATCGAATGGAGCAAGGTGCAATGGAATTTGAACGGCGAGGCGGTTGAA<br/>CTGAATCCTGACGACACCTTGGGTTCCAAGGGCTTCGATCACAATCCTTGT<br/>GCGTTTCAAGACCCCTGGCCTGAATGGCTACAAGGGTACGGGCGTATAA<br/>ATGTTTGGCGATTTTGTCTTTCGCTCACCTATGCAGCTTATGCCCCGTTCTCGT<br/>CAGGGGCCGCTTTGGTTTGGGATGCGGATTTCTGCGGTGGGGCGTGGTTAGT<br/>TCATAGGCACAGCGATGTACAAGCCGCCCTGCGCAATCCCGATTTAAGTGTG<br/>CGGCGTGTGGCGGGTGGGTGGCCAGGCTGGCGCTGACCCCTCCCCTCGTCT<br/>GCAAGCCTTCAAGGGCTTGATGGCCAGGACGCTGGTCTTTCTGGACCGCCCC<br/>CGTCACACACGCGTCAGACGAGTAGTGAACGCGGCTTTTGTGCGAAGGCTT<br/>TGGAACCCTGCACAGCACGATTGAAAAGCGCGTTACGCATATCCACCTGGA<br/>GTTAAAAGACAAGCTGCGGCACGGTTCAGTGGATCTGGTTGATGAGGTCGT<br/>CGCCCCTCCCCGCTTGGTTCATGATGGACGTGCTCGGCTTGGAGCAACTGCC<br/>TTTGTCTGTTTTTTCAGGCCTGGTTCAGAGCAACTGGCAGGTTTTATCGGACAAG<br/>CCACGCCGGATATGCCTTTGCTGAGAAGCACCCAGGACGCCTTGCTGGATAT<br/>GGCTGACTTTCTAGGCAACAGTGCCAATCTGCAAGAAGGCGGGTTGGCCTGG<br/>CGGCTTTTGCATGATGAGCAGCTTTCCCTTCAAGGCAGGCGCGAGCGCTTGGC<br/>ACAGTCCTGTATGTTGCTCTTTGCAAGGCTATGAAACCTCCCGGCATCTGCTTA<br/>GCTCCCTGTTTCAAACACTGCTGGCCGACTCCACAACGCTGCAGGACTTGCTA<br/>TCGAATCCGCAGAAAATTCCTGCCGCGATCAAAGAGGTGCTGCGTCACGACA<br/>GCCCGATTGAGTACACAGCCAGACGTTTGTGCGCGACCAGCACTGGCATGG<br/>TCAGCATTGCGCAAGGGGCAGTTGCTGCTTTTGTCTTTGGGCGCTGCCAAC<br/>CGGATCCGGCGGTGTTTGGCAATCCCGACGATCTGGACTTCAGCCGCAACAA</p> |
| <p><i>Alcaligenes sp.</i><br/>Strain<br/>HPC1271_cyt<br/>ochrome P450</p>                                                        | <p>WP_009457883.1</p> | <p>ATGTCAGACACGAGCTTGCCCACTTTGACAAAGTACGTACGCGTACGCAGTC<br/>CGGCCAACGCCGTTTTGTGGAATTTGATTTTGCCATCGGCCAGCCGGACCTG<br/>TTTGTGGAAGTGGTTCATGCCCCGGCGGCGTTTGTGAGCAGTTTTGTCTGAAAA<br/>CAATGTCCAGCCCATGAGCGATGAGCAAATGCGGGTCAATGACGAGAACGA<br/>AGAGAAATGGCGTTTTGGTTATGACACTTTGGTTCGGCAACAGTTCGTCAGGCTG<br/>AAGCCCAGTAG<br/>ATGGCAGTTACTGCAATTACCCCGGACTACCAAGGCTATGCGCGCGACCAGC<br/>AGTCGACTATGGCGACAGCATGTTGCTGTATATAGGCTGGGACGAGCACCT<br/>TTTGTCTGCTCGGCCAAGGCCTTTCTGGTTCAGCCCGAGATGACCGTGTCCC<br/>AGATGATCCAGCAACTGTTGCCCTGCCGTTTTTGGCCAGCACCTGACTTCGAG<br/>CAGATCGAATGGAGCAAGGTGCAATGGAATTTGAACGGCGAGGCGGTTGAA<br/>CTGAATCCTGACGACACCTTGGGTTCCAAGGGCTTCGATCACAATCCTTGT<br/>GCGTTTCAAGACCCCTGGCCTGAATGGCTACAAGGGTACGGGCGTATAA<br/>ATGTTTGGCGATTTTGTCTTTCGCTCACCTATGCAGCTTATGCCCCGTTCTCGT<br/>CAGGGGCCGCTTTGGTTTGGGATGCGGATTTCTGCGGTGGGGCGTGGTTAGT<br/>TCATAGGCACAGCGATGTACAAGCCGCCCTGCGCAATCCCGATTTAAGTGTG<br/>CGGCGTGTGGCGGGTGGGTGGCCAGGCTGGCGCTGACCCCTCCCCTCGTCT<br/>GCAAGCCTTCAAGGGCTTGATGGCCAGGACGCTGGTCTTTCTGGACCGCCCC<br/>CGTCACACACGCGTCAGACGAGTAGTGAACGCGGCTTTTGTGCGAAGGCTT<br/>TGGAACCCTGCACAGCACGATTGAAAAGCGCGTTACGCATATCCACCTGGA<br/>GTTAAAAGACAAGCTGCGGCACGGTTCAGTGGATCTGGTTGATGAGGTCGT<br/>CGCCCCTCCCCGCTTGGTTCATGATGGACGTGCTCGGCTTGGAGCAACTGCC<br/>TTTGTCTGTTTTTTCAGGCCTGGTTCAGAGCAACTGGCAGGTTTTATCGGACAAG<br/>CCACGCCGGATATGCCTTTGCTGAGAAGCACCCAGGACGCCTTGCTGGATAT<br/>GGCTGACTTTCTAGGCAACAGTGCCAATCTGCAAGAAGGCGGGTTGGCCTGG<br/>CGGCTTTTGCATGATGAGCAGCTTTCCCTTCAAGGCAGGCGCGAGCGCTTGGC<br/>ACAGTCCTGTATGTTGCTCTTTGCAAGGCTATGAAACCTCCCGGCATCTGCTTA<br/>GCTCCCTGTTTCAAACACTGCTGGCCGACTCCACAACGCTGCAGGACTTGCTA<br/>TCGAATCCGCAGAAAATTCCTGCCGCGATCAAAGAGGTGCTGCGTCACGACA<br/>GCCCGATTGAGTACACAGCCAGACGTTTGTGCGCGACCAGCACTGGCATGG<br/>TCAGCATTGCGCAAGGGGCAGTTGCTGCTTTTGTCTTTGGGCGCTGCCAAC<br/>CGGATCCGGCGGTGTTTGGCAATCCCGACGATCTGGACTTCAGCCGCAACAA</p> |

|                                                                                                                        |                       |                                                                                                                                                                                                                                                                                                                                                                                                                                                                                                                                                                                                                                                                                                                                                                                                                                                                                                                                                                                                                                                                                                                                                                                                                                                                                                                                                                                                                                                                                                                                                                                                                                                                                                                                                                                                                                                                                                                                                                                                                                                                                                                                                                                                                                                                                                                                                                                                                                          |
|------------------------------------------------------------------------------------------------------------------------|-----------------------|------------------------------------------------------------------------------------------------------------------------------------------------------------------------------------------------------------------------------------------------------------------------------------------------------------------------------------------------------------------------------------------------------------------------------------------------------------------------------------------------------------------------------------------------------------------------------------------------------------------------------------------------------------------------------------------------------------------------------------------------------------------------------------------------------------------------------------------------------------------------------------------------------------------------------------------------------------------------------------------------------------------------------------------------------------------------------------------------------------------------------------------------------------------------------------------------------------------------------------------------------------------------------------------------------------------------------------------------------------------------------------------------------------------------------------------------------------------------------------------------------------------------------------------------------------------------------------------------------------------------------------------------------------------------------------------------------------------------------------------------------------------------------------------------------------------------------------------------------------------------------------------------------------------------------------------------------------------------------------------------------------------------------------------------------------------------------------------------------------------------------------------------------------------------------------------------------------------------------------------------------------------------------------------------------------------------------------------------------------------------------------------------------------------------------------------|
| <p><i>Alcaligenes sp.</i><br/>II-C-7_alkane<br/>hydroxylase</p>                                                        | <p>ACJ22769.1</p>     | <p>TCAGGCCGAGCTATCCATGGGACACGGAATTCATCATTGCCTGGGAGCCGGT<br/> TTGGTGCAGCTGGAAGCCAAGCTCGTACTTGAGCAATTCCTGCCTTTGCTCCC<br/> TCGCCTGCAAGGGACGCAAGGTGAGCGTATTCGACTCCCCGCCTATCGGGGC<br/> TGGAAACCGCTTGCCGGTTCAATACCGGGCGGCACAGTCATGA<br/> AATACCGGCCATGAGCTGGGGCACAAGACCGACCACCAGAGAAATGGATG<br/> GCCAAGCTATGTCTCGCCCCGGTGTTCATATGGGCACTTCTATGTGGAACATAA<br/> TCGTGGGCATCACGTGAGGGTTCCACGCCGAGGATCCGGCATCCTCCCGG<br/> TTCGGCGAGACGTTCTGGGAGTTCCTGCCGCGACCGTGATCGGCAGCCTTAA<br/> ATCCGCCTGGTCGCTGGAGAAACAGCGGCTGGAGCGGCAGGGGCTTTCGGTA<br/> TGGAGCTGGCATAACGACAATCTGCAGGCCTGGGCATTGTCGGTGGTGTCTTG<br/> GGTGCCCTGATACTGTGGTTGGGCTGGGCGGTGGTGCCGTTCTGCTGATTC<br/> AGAGCCTGTTCCGTTTTAGTTGCTGGAGGTGGTCAACTATATCGAGCA<br/> ATGTCTCAATCTGATCTGGCTCACGTTGACGTGACGATCGTCGGCGGCGGTAT<br/> GAGCGGTGCCGTGCTGGCCCTCTCCCTCGCCGCCCTCCGGGGATCGGACGGT<br/> GCCCCCTGCAGATCCTGCTGCTGGAGGCGAGCGCCCCGAGCTCAATGCTC<br/> ATCCCGGCTTCGACGCCCGGCCATCGCCCTCTCGGCGGGCACCTGCGAGGC<br/> GCTGACCCGCCACGGCATCTGGTCCCGTTTACCCCCATTGCACCCCCATCA<br/> CCGACATTCACGTCTCGGATCGGGGCCACTGCGGCCAGGCCAGGCTGTCCGC<br/> GGCGGAATATGGCTTGCCGGCGCTCGGCCAGGTGATCGAACTCTGTCCGCC<br/> GGGATCGAGTTGCAGCGGGCCCTTGCCGCCACCCCGCAGATACGGGTGTGCT<br/> GCCCCGGCCAGCTCGCACAGATTGAGCCCGACGAAGAAGGGGTGACCCTGA<br/> CCCTCGCCACGAACGAGCGCTATCGGACCCAGCTGCTGGTGGCGGGCGGATGG<br/> GGGCAACTCCTTCGTGCGCCAGCACTTCAAGATGCCGGTCACTGCGCCACGAC<br/> TATGGCCAGAGCGCCATCATCGCCACGGTGAAGACCGCCCTGGACCCCGCCG<br/> GGCGGGCCTTCGAGCGCTTACCGAAGGGGGGCGCTCGCCCTGCTGCCGAT<br/> GCAGGAGGGGCTCTCCTCCCTGGTCTGGAGCCTGGCGGGGACGAGGCACAG<br/> GCCCTGATGGCGCTGGACGACGCGGCGTTTTCTCGCCCCCTGCAGCAAGCCT<br/> TTGGCTGGCGCCTCGGGCGTTTTCGAACGCACCGGCGTGGCCACCTCTATCCG<br/> CTGGTGTGACGGTGGCCGATTATCCCCTGGCCCAGCGCACCGTGCTGGTGG<br/> GCAACGCCGCCCATCTGCTGCACCCCATCGCCGTCAGGGCTTCAACCTCGG<br/> CATGCGCGACCTTGACCTGCTCACCCGCGCCGTTGGCCAGGCGCTCCTGGCG<br/> GGGAGGACATCGGCAGCTTCGAGGTGCTGAACGGTACTGGCAATCGCGCC<br/> GGGAGGATCAAGCCCAGACCGTCTGGCTCACCTCCTCCCTGGCCCAGCTCTTC<br/> TCCAACGCCACGCTCCCCTGGTGGCGGGGCGCAACCTGGCGCTCTCTGAT<br/> GGGGCGACTGCCCTGGCTCAAGGCGCCGCTGGCTTCCCGCACCTGGGGTTC<br/> GTCACCGACGTGTGCCGGCCATGA<br/> ATGATCAAGCCGTTTCCATCAGCATTGAGAACACCCAGGACGGTTTTCGCCAT<br/> CATCGAAGCCATCCTGGCCGACAACCCCGAGGCCAAGAGCAACCCCTTCCCG<br/> GCCATGACCAAGATCGACTGCCCCGGTCCGGCTGGAAATCCCGCGCCGAGAGC<br/> GTTTCCGAACGCCTGGGCCGCGACTGGGATCCTCAGGAAATCCACCTCAGCG<br/> TCATCTCCCTGTCCGTTCCGGTGGACGAGGACGACGGCTCTCTGATCATCTTC<br/> TGGAGATAG</p> |
| <p><i>Aeromonas<br/>taiwanensis</i><br/>LMG<br/>24683_2-<br/>octaprenyl-6-<br/>methoxyphen-<br/>yl<br/>hydroxylase</p> | <p>WP_043759840.1</p> | <p>ATGAACATCGACATCCAGGCCGAGGCGATCACGCCGCGGCGTCATACCTTCT<br/> CGCACATCGCGCGGCGCTTCGGCGTCGACAAACCCGCCCTCGCGCTATGAAGA<br/> GGCGACCTATGACGTGACGCCGGTGGTCAACTTCCACTATCGGCCGACCTAT<br/> ACGCCGAGTTCGAACTGTACGACCCGCGCCGCACCCGCATCGTGATGAACG<br/> ACTGGTACGTCTCCGCGATCCGCGCCAGTTCTATTACGCCTCCTACAACATC<br/> AGCCGCGCGGCCATGCAGCAGTCGTTCCGACGACGCCGTGAACTTCGTCGAGA</p>                                                                                                                                                                                                                                                                                                                                                                                                                                                                                                                                                                                                                                                                                                                                                                                                                                                                                                                                                                                                                                                                                                                                                                                                                                                                                                                                                                                                                                                                                                                                                                                                                                                                                                                                                                                                                                                                                                                                                                                                                                                                           |
| <p><i>Brevundimona<br/>s diminuta</i><br/>3F5N_monoo-<br/>xygenase</p>                                                 | <p>WP_087139175.1</p> | <p>ATGAACATCGACATCCAGGCCGAGGCGATCACGCCGCGGCGTCATACCTTCT<br/> CGCACATCGCGCGGCGCTTCGGCGTCGACAAACCCGCCCTCGCGCTATGAAGA<br/> GGCGACCTATGACGTGACGCCGGTGGTCAACTTCCACTATCGGCCGACCTAT<br/> ACGCCGAGTTCGAACTGTACGACCCGCGCCGCACCCGCATCGTGATGAACG<br/> ACTGGTACGTCTCCGCGATCCGCGCCAGTTCTATTACGCCTCCTACAACATC<br/> AGCCGCGCGGCCATGCAGCAGTCGTTCCGACGACGCCGTGAACTTCGTCGAGA</p>                                                                                                                                                                                                                                                                                                                                                                                                                                                                                                                                                                                                                                                                                                                                                                                                                                                                                                                                                                                                                                                                                                                                                                                                                                                                                                                                                                                                                                                                                                                                                                                                                                                                                                                                                                                                                                                                                                                                                                                                                                                                           |
| <p><i>Brevundimona<br/>s diminuta</i><br/>BZC3_phenol<br/>hydroxylase</p>                                              | <p>WP_088410947.1</p> | <p>ATGAACATCGACATCCAGGCCGAGGCGATCACGCCGCGGCGTCATACCTTCT<br/> CGCACATCGCGCGGCGCTTCGGCGTCGACAAACCCGCCCTCGCGCTATGAAGA<br/> GGCGACCTATGACGTGACGCCGGTGGTCAACTTCCACTATCGGCCGACCTAT<br/> ACGCCGAGTTCGAACTGTACGACCCGCGCCGCACCCGCATCGTGATGAACG<br/> ACTGGTACGTCTCCGCGATCCGCGCCAGTTCTATTACGCCTCCTACAACATC<br/> AGCCGCGCGGCCATGCAGCAGTCGTTCCGACGACGCCGTGAACTTCGTCGAGA</p>                                                                                                                                                                                                                                                                                                                                                                                                                                                                                                                                                                                                                                                                                                                                                                                                                                                                                                                                                                                                                                                                                                                                                                                                                                                                                                                                                                                                                                                                                                                                                                                                                                                                                                                                                                                                                                                                                                                                                                                                                                                                           |



*Brevundimona  
s diminuta*  
NCTC11164\_3  
-(3-  
hydroxyphen  
yl)propionate  
hydroxylase

SPU44975.1

AACGCGACCTGATCGCCGATGTGCCCCGGAATGGCGCGACCTGTTGCCCGC  
CTGGCTGCTGCCGCTGCGCCATGTGGAATGGGCGGCGAACATGAACTGCCAG  
CTGATCGCCGACTGGGGCTATGGGACGCAGATCACCTCGGCGGCGGCCTTCT  
GCGGGGCCGACCGCCTTGGCATCGCCAGGTCATCTCGCGCATCGGCCTGCT  
GCTGGGTCAGGGCACGAAAGCGCCCTGAAGGAAGCCAAGACCCAATGGCT  
GGAGGCCGACGCTCTGGCAACCCCTGCGCCGCCTGGCCGAAGACCAGCTGGTC  
GTCCATGACTGGTTCGAGCTCTATGTGCCCAGCTGATCGTGCTGGACGGCTA  
CATCTATCCGCTGGCGACGGGCGCCTTCGACCGTGCGGGCGCGGCGCACAAAC  
GGCGCCGCCTTCTCGATGATGACCGGCTTCCTGGGCGACTGGTACGCCGACA  
ACAGCCGCTGGACCGACGCCGTCATCAAGGCCGCCGCCGAGAGTCCGAGG  
CCAACCGCATCGTTTTGGGCGAATGGTTTCGAGCGCTGGTCCGCCCGCGCCGA  
AGAAGCCGTCCGCCCCCTCGCCGCCATGGTGTGGGCGCCGAAGGCGACGCC  
GCCGTCGATGCGGTGCGCGCGCCTGCGTGAACGGATGGTCGGACTGAACG  
CCCTAGAAGCGCGGGAGATGGCGGCATGA  
ATGCTTGATTCCATGAACGACGCCGCCCTCCCTCCCCGTGGTCATCGTCGG  
CGGCGGGTTCTCCGGCGCCATGCTGGCCGTGCGCCTGGCCGAAGTGGCCAA  
GCCTCGGTCTGATCGAGCGCAGCGAACAGGTGCGCCTCGGCGTCGCCTATT  
CCACGCCGCTGGACGACCACCGGCTGAACGTCCGCGCCGAGCGGATGAGCG  
CCCCCCCCGACCGCCCCGCCACTTCACCGACTGGTTGGCGCTCCACGCCCC  
CGCCTTCGCCGATCCGAACGGCTTCGCCCCGCGCCGCCTCTACGGCCTCTATG  
TGCAGGCCCGCCTGGCCGAGGCCGAGGCCGCCCGTCCCGGCCCTGATCCGTCG  
TGTGAAGGGCGAGGGCGTCCGCATCGAAGGCGAGACCGTCCTCCTCGCCGAC  
GGCGCCCCGATCCCCGGCCGCGCCGTGGCGCTGGCCACCGGCAACCCGCCGC  
CGCGCCCCGCGTGGCGGGCGAAGGCCCCCCGCGCATCGCCGACCCGTGGC  
GGTCCGACGCTCTGGCCGCGATCGGCCCCGACGATGACGTGCTGATCCTCGG  
TTCCGGCCTGACCATGGTCGATGTCGTTCTGGCGTTTACGGCTCAGGGCTGGC  
GCGGCCGGGCGACGGTCGTGTCGCGGCGCGGCCTGCTGCCCCAGGCCACGG  
CGCCCATCACGACGCCCCATCGACCTGCCGCCGAGGCGCTGACCGGCGCC  
CTGTGCGCGCCGCTGGCCTCGGCGCGACGACTGGCGCGCGATCACGGCTGGC  
GCCGCGTATGGAGGGTATCGCCCCGTCACCGCCGCGTGTGGGGCGCCGC  
GACGATCGCCGAGCGCGGCCGCTTCCTGCGCCATCTGCGTCCCTGGTGGGAC  
GTTTCATCGCCACCGCATCGCGCCCCGAGATCGCCGCCGTGCTGGAAAGGTTGA  
AAGCGGAGAACCGACTGACCGTCGTGCGGGGCCGCGCCAGGCGATGGCGG  
CCGACCGCCAGGCCGCGAACCTGACCGTCCGTCCACGGAACGGCGAAGTTC  
AAGCCTTCTCCGCCGCTGGTTGATCGACTGCACCGTCCCGGCCACGACGC  
CGCCTGCACGCCCTGACCGCCGCCCTGATCGCCGAAGGCCGCGCCCCGCTC  
GATGCGGTGATCTGGGCCTCGACCTCGACGCCGAGGGCCGCGTGTGTCACG  
CCGACGGCGTCCCGACCCCCGGCCTGTTCTGTGCTCGGCCCCCCGGCTCGCGC  
CGCCTTCTGGGAGACGATCGCCGTGCCGGACATCCGCCAGCGCATCGAAGCC  
CTGGCCCCGCTCTCGCCGATTGGCGCCAGCCGTTACGGCGCGGTTCGGAATTT  
CTAA

*Serratia  
marcescens  
subsp.  
marcescens*  
Db11\_2-  
octaprenyl-3-  
methyl-6-

WP\_025301854.1

ATGAAGACATCTCAAATCGGTATGACGCGGTGGTGGTGGGTTGGCGGCATGG  
TCGGCGCGGCGGCGGCCCTGGGGCTGGCGCAGGCGGGCTGGTTCGGTGGCGTT  
GCTGGAACATCAGGCGCCGAGGCGTTTCGAGGCGCAAAGCCCGCCGGACCT  
GCGCATTTCGCGATCGGCTGCACCTCGGTGGGGCTGCTGAAACAGCTCGGC  
ACCTGGCAGGCCGTGACGGCGATGCGTACGGCGCCGTATCGCCGGCTGGAGA  
CCTGGGAGTGGGCGTCTGTCGTGCGTGGCGTTTCGACGCGGTGTCCCTGGGGCTG  
CCCGAGCTGGGCTTTATGGTGGAAAACCGCATTTCTGCAGCTGGGGCTGTGGC

methoxy-1,4-  
benzoquinol  
hydroxylase

AACAGTTCGCGCAGTGCGCCAACCTGACGCTGCTGTGCCCCGCCAGGCTGCA  
ATCGCTGCAGCGGGCGGACAATGCCTGGCAGCTGACGCTGGACAGCGGCGA  
GACGCTGCAAGCGCGGCTGGTTGTTCGGTGCCGACGGGGCCAACTCGCAGGTG  
CGCAAGCTGGCGGCGATCGGCACCAACGGCTGGCAATATCGTCAGGCGTGCA  
TGTTGATCACCGTCGATACCGGCGCGCCGACGAGGATGTGACCTGGCAGCG  
CTTCTTCCCGTCCGGGCCCGCGCCTTCCTGCCGCTGTACGACAGCTGGGCGT  
CGCTGGTGTGGTATGACAGCCCCGAGCGCATTTCGCCAACTGCAGGCGATGCC  
GCCGCGCAGCTGGAGCGGAAATCGCTACCGCTTTTCCGGCGCGACTGGGC  
CCGGTCAAGGTGCACGCTGCCGGATCGTTCCCGCTGACGCGGCGTCATGCGC  
AGCGCTACGTGCTGCCGGGGCTGGCGCTGGTGGGCGATGCCGGCGCATAACCAT  
CAACCCGCTGGCCGGGCAGGGCGTCAATCTGGGGTATCGCGATGTGGATGCC  
TTGCTGAACGTGCTGAGCGAGGGCGCGGGATCAGGGAGAGGACTGGAGCAGC  
GAGGCGGTACTGCTGCGTTATCAGCGTCGCCGCCGTACCGACAATCTGCTGAT  
GCAGAGCGGCATGGATCTGTTTTATAACCGCCTTCAGCAATAACCTGGCGCCG  
CTGAACGTCGCGCGCAATCTGGCGCTGATGGCCGCGCAGCGGGCGGGCAAG  
CTGAAAGAACATGCGTTGAAGTACGCGTTGGGATTGTAA

*Pseudomonas  
aeruginosa*  
DSM 50071 =  
NBRC  
12689\_4-  
hydroxybenz  
oate 3-  
monooxygenase

AKO84441.1

ATGAAGACTCAAGTCGCCATCATCGGCGCCGGTCCGTCCGGCCTCCTGCTCG  
GCCAGTTGCTGCACAAGGCCGGCATCGACAACGTGATCCTCGAACGCCAGAC  
CCCGACTACGTGCTCGGCCGCATCCGCGCCGGCGTGTGGAACAGGGTATG  
GTCGACCTGCTGCGCGAGGCCGGCGTCCGACCGGCGCATGGCGCGGACGGG  
CTGGTCCACGAAGGCGTGGAGATCGCCTTCGCCGGGCAGCGCCGGCGCATCG  
ACCTGAAGCGCCTGAGCGGCGGCAAGACGGTGTGGTCTACGGCCAGACCG  
AGGTCACCCGCGACCTCATGGAGGCCCGGAAGCCTGCGGCGCCACTACCGT  
CTACCAGGCCCGGAGGTGCGCCTGCACGACCTGCAAGGTGAGCGCCCCTAC  
GTGACCTTCGAACGCGACGGCGAACGGCTGCGCCTGGATTGCGACTACATCG  
CCGGCTGCGATGGCTTCCACGGCATCTCGCGGCAATCGATCCCGGCGGAACG  
GCTGAAGGTCCTCGAGCGGGTCTATCCGTTCCGGTGGCTCGGCCTGCTCGCCG  
ACACCCCGCCGGTCAGCCACGAACTGATCTACGCCAACCATCCGCGCGGCTT  
CGCCCTGTGCAGCCAGCGTTCGGCGACCCGACCGCTACTACGTACAGGTG  
CCATTGACAGAGAAGGTTCGAGGACTGGTCCGACGAGCGCTTCTGGACGGAA  
CTGAAAGCGCGCCTCCCGGCCGAGGTGGCGGAGAACTGGTGACCGGTCTT  
CGCTGGAGAAGAGCATCGCGCCGCTGCGCAGCTTCGTGGTTCGAGCCGATGCA  
GCATGGCCGGCTGTTCTCGCCGGCGACGCCGCGCACATCGTGCCGCCACC  
GGCGCAAGGGACTGAACCTGGCGGCCAGCGACGTCAGCACGCTCTACCGG  
CTGCTGCTGAAGGCCTACCGCGAAGGGCGCGGCGAACTGCTGGAACGCTACT  
CGGCAATCTGCCTGCGGCGGATCTGGAAGGCCGAACGCTTCTCTGGTGGAT  
GACTTCGGTGCTGCATCGCTTCCCCGACACCGACGCGTTACGCCAGCGCATCC  
AGCAGACCGAACTGGAGTACTACCTGGGCTCCGAGGCGGGCCTGGCGACCAT  
AGCCGAGAACTATGTCCGCTGCCCTACGAGGAAATCGAGTAG

*Pseudomonas  
aeruginosa*  
DSM 50071 =  
NBRC  
12689\_cytochr  
ome P450

WP\_003091710.1

GTGCCTGATCGCAAACCTGAGACTGGGCGAGGAACTGATCTCGCCACTGCACG  
CGCTTACGACGGCCTGCAGGTGGACGGCGCGCCGCGTCCCGCGCATCGCGC  
CGCCGAGCATCCGGTGTGGGTGGTACGCGCTACCGCGACGCGCGCAAGGTC  
CTCAACCATCCGGGCGTCCGCCGCGACGCCCGGAGGCCGCCGAACTCTACG  
CGAAGCGTACCGGCAGCCCGCGCGCGGGGATCCGTGAGGGACTCAGCCACC  
ACATGCTCAACCTCGACCCGCCGACCATAACCGCCTGCGCTCGCTGGTTGG  
CCGCGGTTACCCCGCGCCAGGTGGAGCGCTGCAACCGCATATAGAACGG  
ATCACCGAGGAATTGCTGGACGCCATGGCCGGCCGCGAACAGGCCGACCTG  
ATGGCCGACTTCGCGATCCCGCTGACCATCGCGGTGATCTTCGAGCTGCTGGG

*Pseudomonas  
aeruginosa*  
DSM 50071 =  
NBRC  
12689\_2-  
octaprenyl-3-  
methyl-6-  
methoxy-1,4-  
benzoquinol  
hydroxylase

WP\_003120388.1

CATTCCCGAGGCCGAGCGGAACACGCCCGCCAGTCCTGGGAGCGCCAGGC  
GGAAGTGTGTCGCCGAGGAGGCCAGGCCCTGGCCGATGCGCAGGTGCA  
CTACCTGCGCGTGTGCTGCTCGAGGCCAAGCGCCGGCAGCCGGCCGACGACGTC  
TACAGCGGGCTGGTGCAGGCCGCCGACGAGAGCGGCCAGTTGAGCGAAGCG  
GAACTCGTCTCCATGGCCACCTGCTGATGATGAGCGGCTTCGAGACCACCA  
TGAACATGATCGGCAACGCGCTGGTCACCCTGCTGGTCAACCCGGAGCAACT  
GGCGTTGCTGCGGGCGCAGCCGGAACCTCTGCCAACGCCATGGAAGAACTG  
GTCCGCCACGACAGTCCGGTGCAGCGCCTCGATGTTGCGCTTCACCGTGGAAG  
ACGTGGAAGTGGACGGGGTACCATTCCCGCCGGCGAATACATCCTGGTCTC  
CAACCTGACCGCAACACCGATGCCGAGCGCTTCGACGATCCCGACCGCCTC  
GACCTACCCGCAACACCGATGGCCATCTCGGCTACGGCTTCGGCGTGCCT  
ACTGCGTCCGGCGCCTCGCTGGCCCGGCTGGAGGGGCGGATCGCCATCCAGCG  
CCTGCTCGCGCGCTTCCCCGACCTCCAGTTGGCGGTGCCCCACGCGGAGCTGC  
AGTGGCTGCCGATCACCTTCCCTCCGCGCCTGATCAGCGTGCCGGTGCACACC  
GGATGCAGCGCCCCGGCGAACACCGCCTCCACGCCAACCCGATCGAGAGG  
ATCGCCCAATGA

ATGCACGCGGATCTGGTCATCGTCCGGCGCCGGCATGGTCGGTAGCGCCCTGG  
CCCTGGCCCTGGAGGGCAGCGGCCTGGAGGTGCTGCTGGTGGACGGCGGCTC  
GCTCGACGTGGCGCCGTTCAAGCCGGAGGCGCCCTACGAGCCGCGGGTCAGC  
GCGCTGTCCGAAGCCAGCCGGCGGATTCTCCAGCGCCTGCATGCCTGGGACG  
GCATCGTCCGCGCGCCGCGCCGAGCCCTATCGCGAGATGCAGGTGTGGGATGG  
CTCCGGCACCCGGGCGGATCGGCTTACGCGCCGCCAGCGTGCACGCCGAGGTA  
CTCGGCCATATCGTCGAGAACC GGTTGGTGCAGGACGCCCTGCTGGAACGCC  
TGCACGATTCCACCACCGCCTGCTGGCCAATGCGCGCCTGGAACAGATGCG  
CCACTCCGGCGACGACTGGTGTGACCTGGCCGACGGTCGCCAGCTGCGT  
GCGCCGCTGGTGGTGCAGCGCCGACGGCGCCAACCTCGGCGGTACGCCGCTGG  
CCGGCTGCGCCACCCGCGAATGGGATTACCTGCACCACGCCATCGTCACCAG  
CGTGCCTGCGAGAACGCGCACCCGCGCAACCCGCTGGCAGCGCTTCACCGAC  
GACGGTCCGCTGGCCTTCCCTGCCCTGCCGACCCGCGGCGACGAGCACTGGT  
GCTCGATCGTCTGGTGCACCACCCCGGAACAGGCAGAACCGCTGATGGCGTT  
GGACGAGGATGGCTTCCGCGCCGCCCTCGGCGAAGCCTTCAACAGCGCCTG  
GGCGCCATCCTGCATGCCGACCGGCGCCTGTGCATCCCGCTGCGCCAGCGGC  
ACGCCAAGCGTTACGTGAGCCGGGCCTGGCGCTGGTCCGGCGATGCTGCGCA  
CACCATCCACCCGCTGGCCGGACAGGGCGTGAACCTGGGCTTCCCTCGATGCG  
GCGGTGCTGTCCGAGGTCTTGTGCACGCCCTGGAGCGCGGCGAACGGCTTG  
CCGACGAACGCGTGTGAGTGCCTTCGAGCGGCGGCGGATGCCGCACAACCT  
GGGCATGATGACGGCGATGGAAGGCTTCGAGCGCCTGTTCCAGGCCGACCGG  
TTGCCGCTGCGCTGGCTGCGCAACGCCGGCCTGCGCCTGGTTCGACGGCCATC  
ACGAGGCGAAGGCGCTGTTCTCGTCCGCCAGGCGCTTGGCCTCAGCGGCGACCT  
GCCGTCGCTGGCACGAGTCTGA

*Pseudomonas  
aeruginosa*  
DSM 50071 =  
NBRC  
12689\_alkane  
1-  
monooxygenase

WP\_003083349.1

ATGTTTGCCTCGCTTTCCTCTGCCTGGATGCTGCGTCTGAAAAAGTACGGCTA  
CTGGATCTGGCTGATCGCGGTGCTCGGCATCCCGCTCAGCTACTGGTGGTTCGC  
TCGGTAGCGACTACCCCAACGCCTGGCCCTGGCTGGTATCAGCGTGGTGTTC  
GGGCTGATCCCGATCCTCGATGCCATCGTCCGGCCGCGATCCGGCCAACCCCG  
AGGAAGCCAGCGAAGTGCCGGAGATGGAAGCACAGGGCTACTACCGCGTAC  
TGTCCCTGGCCACCGTCCCGCTGTTGCTGGGCATGCTCGTCTGGTCCGGCTGG  
ATCCTCGCCACGAGACCCGCTGGGACTGGGTCCGCCAACCTGGGCTGGATCC  
TGTCGGTGGGCACCGTGATGGGCGCCATCGGCATCACCGTCTCCACGAACT

*Rhodococcus*  
*ruber*  
OA1\_hydroxy  
lase

RQM33257.1

GATCCACAAGGACCCGCAACTGGAACAGAACGCCGGCGGCTGCTGCTGGC  
AGCGGTGTGCTATGCCGGCTTCAAGGTGGAACACGTGCGCGGCCACCATGTA  
CACGTCTCGACCCCGGAAGATGCCTCGTCTCGCGCTACGGCCAGAGCCTCT  
ACTCGTTCCTCCCGCACGCCTACAAGCACAACCTTCTCAACGCCTGGCGCCTG  
GAGGCCGAGCGCCTGAAGCGCAAGGGCCTGCCGGCCCTGCACTGGCGCAAC  
GAGCTGATCTGGTGGTACGCCATCAGCGCCCTCTTCTGCTCGGCTCAGCCT  
GGCCTTCGGCTGGCTGGGAGCGATCTTCTTCTCGGCCAGTCGGTGATGGCCT  
TCACCCTGCTGGAGATCGTCAACTACGTGAGCACTACGGCCTGCATCGGCG  
GCGCCTGGACAACGGCCGCTACGAACGCACCACGCCGGAACACTCGTGAA  
CAGCAATTTCTCTGACCAACCTGTTCTTTTCCACCTGCAGCGCCATTCCGA  
CCACCATGCCTACGCCAAGCGCCGCTACCAGGTGCTGCGCCACTACGACAGC  
AGCCCGCAACTGCCCAACGGCTACGCCGGGATGATCGTCTCGCCCTGTTCC  
CACCGCTCTGGCGCGGGTATGGACCCGAAGGTGCGCGCCTACTATGCCGG  
CGAGGAATACCAGCTTACCGACACCCAGCGCATCTGA  
ATGGGAGCCGAAACGTCACCGTCACCGTCCCGTCCATCCGCCGCCCCGGTGC  
GCGTGCCGGCCGACCATCCCGGCGTCGCCGAGCTGTTGCGGGTGTCTCGCCTA  
CGGTGAGATCTCGGCCTTCTATCGCCTTGCCGACGATGCGCGGATGTCGCCGA  
GCCTGCAGGGGCGGGTGGCGTTCGCAAGCATGGCGGCGGCGGAGATGAGCC  
ACTTCGAGACGCTGCACGCCGCCCTGACCGCGCGCGGTGTCGAAATCTACGC  
GGCGATGGAGCCCTACCGGCGTGCCTTCGACGCCTACCACGCGTCCACGAAC  
CCGTGCAACTGGCACGAGTCGCTGGTCAAGGCATATGTCGGCGACGGCATCG  
CCGCCACTTCTACCGCGAGATCGCCGGTACCCTCGCCCCGAGGTGGCCGA  
GGTCTGACGAGAGGTGCTCGCCGAGACCGGGCACTCGGAATTCGTGGTGCAC  
GAGGTCCGCGAGGCGGTGCGGCACAGCGCCGCCGACAAGGACCGGCTGATG  
CTGTGGGGGCGGCGGCTGCTGGGCGAGGCCATACCCAGGCCAGTACGTGA  
TGGCCCAGCGGGAGGATCTACCGATCTGGTGATCGCCGCTACCGGTGATCT  
CGCCGACATCGCGCGTGTTCGACCGGATGCAGCTCGAGCACGCCGACCGG  
ATGGCAGTGCTGGGACTGCACTAA  
ATGTCGACCTACTACCAGCCCCGCAAGTACCCCGCCTCCGACTTCGCGTCGAT  
GCAACCCGACGCCGAGGCGCTGCCCGTGGTCGTCTCGGAGCCGGACCCGTC  
GGCATGGCCGTCGCCCTCGGCCTCGCCAGCGCGGCATCCCGTGACGATCC  
TCGAGGCGGCAGTCCAGGTCTCCTTCGGCAGCCGTGCCATCTGCATCTCCCGG  
CACAGCCTCGAGGCCGCCGACGTCCTCGGCTTCGGCGCCGAGCTGGAGAAGA  
TCGTCTGCCCTGGGTGCGCGGCCGAGCTTCTACCGTGACCAGCAGGTGCTG  
CACTTCCGGATGCCGACGCGGAGTTCGACGTGCGACCGCCGATGATCAATG  
TCTCGCAGTCCGAGTACGAGCAGATCGTCTGTCGACACCATCGAGCAGAACCC  
GCTGATACCCCTGCACTGGCAGGCGAGCATCGCCGGCATCCTGCGCGACGAC  
GACCACGTGACCCTGGAGGTGACACCCGATTCGGCAAGCGTCACCTGCGGG  
CCGCATGGGTGCTCGCCGCCGACGGCGGCCGAGCCGCATGCGTGAGCTCGC  
CGGTCTGCGACTCGAGGGCACCAACTACGAGGGCCGCTACGTCATCGCCGAC  
ATCCACTGGGAGTCGGAGCTGCCCCGCCGAGCGCATGGTCTGGTTCGATCCGC  
CGAGCAACCCCGGCTCGACGATCATATGCACAAGCAGCCGAAGAACATCT  
GGCGCATCGACTACCAGCTCGATCCGTCCGAGGACGCGGAGATCGAGACCC  
GCGAGGACGCCATCCGGGCCCCGCATACCAAGCACCTGGACTGGCTGCAGA  
ACGACCTGCCCTGGACGCTCGAGTGGCACGGGTTCTACAGCGCCCCGCGCCT  
CGCGCTGCGCGAGTTCACCCACGACCGCCTCTCTTCGCCGGCGACGCCGCG  
CACCTCGTGCCGATCTTCGGCGTGCGCGGCCTGAACTCCGGCATGGAGGACG  
CCGAGACCCTGGCCTGGCAGCTCGCCGCCGTCGTCCACGGCAACGCCGACCG

*Rhodococcus*  
*ruber* YC-  
YT1\_aromatic WP\_119699570.1  
ring  
hydroxylase

CGCGTCTGCAGGCGTACTCGATCGAACGACACGACGCGTGGGAGCAGAA  
CGTCGCGAACGCCGTAAGTCCACGCTCATCATGTCCCCGGGCACCCACGGC  
TACCGCACCCCGCGATGCCGTGCTCGCGCTCGCCGTGAACCGCCCCGAAT  
TCGGGGAAGTATCAACCCGCGCCAGTCCAGCGCCACCCACGCCCGCCTGTC  
GCCGCTGACCTGGCCGGTTCGCGGAGGGCCTGACCGGGGTCTGCCCGGCGAC  
CCCGTTCGAGGACCGCCGCGTTCGCGGTCGCCACCGCCGGCGGCGGCACCGAG  
TCGTGCTCAACGCGGTGCGCGGCAACGGCTTCGCCGTCGTGGGCTTCGGTCT  
CGACGCCCGCCGAGCGCCGCGCTCGCGGCGGCCACGGCCGACCTCGCCGC  
CGCGCTGGCGCCGGAGAGCGTGCCTGCGTTCGTGCGGTGCCGATAGTTCC  
GGTGCCGACGGTTCGATGATGTCACGGTGTCTGACGCGCCCGATCTGGCCG  
AGGCGCTCGGCGCCACCCCGGGCGAGGCCTTCGTGATCCGGCCCCGACGGGCT  
GCTGCTGTGCCGGGTGCCGGTTCGCGGCCCTGTCCGGTGTGCCCGCCGACTCC  
GCACCGGCACGGCCCCGAGGGGCGCGGTCCCCGCGCGCCCGGCACAGA  
TCCTCACAGAGGGCGAGCAGCGTGTGAGAACGTCTGGCTCGGCCTGTCCGA  
CGCGCTCGACCAGGTCGATCCGTCCGACCGGGAAGGATTTTTGGTGCGGCTC  
GCGCTGCAGCTCGGGTTCGAGGCCGGTACCGCGAGTTCGAAGAAGCCATCG  
CAGCGGCGACCGACACGTCGCCGGTGTCCACCCGGAACTGGCGCCACAGG  
CCTGA

ATGAGCACTACAGAGCAGGTCACGGAGCTGATCCCGGACACCGTCGCCCCG  
CAGATCGTGTGCCCGAAGGGCACCCGGGACAACGACGCGTTGTTTCGAGGCCT  
ACCGCTGGCTGCGTGAGAACACCCGCTCGGCCGCGCCGTGGTCGAGGGATA  
CGACCCGCTGTGGCTGGTGTAGCAAGCACGCCGACATCATGGAAATCGAGCG  
CCAGCCCGACATCTTACCAGCGCAGGGCGGCGACGACAAGGGGTCCGTCAA  
CCCGATCCTGGCGAACAGGCCGGCGACGAGTTCACCAAGAGCATCAACAA  
CGGCAGTCTCCGATCCTCGAGACCCTCACCTACCTCGATCCGCCGGAGCAC  
ACCGAGATCAAGGACATCGCGATCGACTGGTTCCGGCCGACCAACCTCGCGA  
AGTGGGAAACCGTCATCCGTGACCTTGCCAAGGCGTCCGTACCCGGCTCCT  
CGAGACGGACGGACGGATCGACTTCGTCAAGGACTTCGCCCTCCACTACCCG  
CTGCACGTATCATGAGCCTGTTCCGGGTGCCCGAGGAAGACGAACCCCGCA  
TGATGGCCCTGACGCAAGAGTCTTCGGGACGGCCGACCCCGATGCCGTCCG  
TGAGGATGTGCAACCGCTACCCCGGACGCCGCGCCAAGCAGTGGGTGGCC  
ACGATCCAGGACTTCTACGCGTACTTCGAACGGTGTCTCCAGGATCGCCCG  
CCAATCCTCGAGACGACCTCGCCACGATCATCTCCTCGGCCCGCGACAAGGA  
CGGCGAGTACTACCCGAACGAGATGGCCTACGGTTGGTTCATCGCCATCGCG  
ACCGCGGGCCACGACACCACCTCGAGACCCTCGCGGGCGGCATGCTCGAG  
CTCGGCCGCAACCCGGACAGCTCGCCAAGGTGAAGGCCGACCTGGCGCTCG  
CTCCGCACCTTGTAACGAGTCGCTGCGTGGGCTCGCCGGTCAAGCACTTC  
ATGCGTCAGGCGACGCAAGGACTACACGCTGCGCGGCCGCGACATCAAGAAG  
GGCGACCGCTTCATGCTGCTGTACCAGTCGGGCAACCGCGACGCGGAGGTCA  
TCCCCGACCCCGATCGCTTCGACATCACCCGCCGGCCCAACAAGCACATCGC  
CTTCGGTACGGTCCGCACATGTGCATCGGCCAGCACCTGGCGAAACTGGAA  
CTGCGCATCATGTTTCAAGAACTGCTCCCCACATCGAGTCCCTCGCGTGGT  
GGACGACACGAAGATGATCCAGACGAACCTTCGTGGGCGGGCTCAAGAACAT  
GCCCGTCCAGATCGAGTTCACCGGGTAA

TTGAGTAGGCAGAGCCTGACCAAGGCCATGCAAAGATCACCGAGCTGACG  
TGGAACCGACGTTTCGCGACGCCGGCCACCCGCTTCGGCACCGACTACACGT  
TCGAGAAGGCCCCCAAGAAGGACCCTCTCAAGCAGATCATGCGGTCTACTT  
CCCCATGGAGGAGGAGAAGGACAACCGGGTCTACGGCGCGATGGACGGCGC

*Rhodococcus*  
*ruber* YC-  
YT1\_cytochro  
me P450

WP\_102031076.1

*Rhodococcus*  
*ruber* YC-  
YT1\_methane

WP\_010596327.1

monooxygenase

GATCCGCGGCAACATGTTCCGCCAGGTCCAGCAGCGCTGGCTGGAGTGGCAG  
AAGCTGTTCTCTCGATCATCCCGTTCCCGGAGATCTCCGCGGCCCGCGGAT  
GCCGATGGCCATCGACGCGGTGCCCAACCCGAGATCCACAACGGTCTCGCG  
GTGCAGATGATCGACGAGGTCCGGCACTCGACGATCCAGATGAACCTCAAG  
AAGCTCTACATGAACAACACTACATCGATCCCGCCGGGTTTCGACATGACCGAGA  
AGGCGTTTCGCGAACAACACTACGCGGGCACCATCGGCCGGCAGTTCGGGGAGG  
GCTTCATCACCGGTGACGCGATCACCGCGGCCAACATCTACCTGACCGTGGT  
CGCGGAGACCGCCTTACGAACACCCTGTTTCGTGGCGATGCCCGACGAGGCC  
GCCGCCAACGGTGACTACCTGCTGCCACCCTGTTCCACTCGGTGCAGTCCGA  
CGAGTCCGCGCCACATCTCCAACGGCTACTCGATCCTGCTCATGGCCCTGGCCG  
ACGAGCGGAACCGGCCGCTGCTCGAACGCGACCTGCGCTACGCCTGGTGGAA  
ACAACCACTGCGTGGTTCGACGCGCGATCGGCACGTTTCATCGAATACGGCAC  
CAAGGACCGCCGCAAGGACCGCGAGAGCTACGCCGAGATGTGGCGGGCGGTG  
GATCTACGACGACTACTACCGCAGCTACCTGCTCCCCCTCGAGAAGTACGGG  
CTCACCATTCGCGACGATCTCGTCGAGGAGGCGTGGAAAGCGCATACCGAGA  
AGGGTTACGTCCACGAGGTGGCCCGGTTCTTCGCCACGGGCTGGCCGGTGAA  
CTACTGGCGGATCGACGCCATGACCGACGCGGACTTCGAGTGGTTCGAGGAG  
AAGTACCCCGGCTGGTACTCCAAGTTCGGCAAGTGGTGGGAGAACTACAACC  
GCCTCGCCTACCCCGGCCGCAACAAGCCGATCGCGTTCGAGGAAGTCGGATA  
CCAGTACCCGCACCGCTGCTGGACCTGCATGGTGCCGGCCCTGGTCCGCGAG  
GACATGGTTCGTGGAGAAGGTTCGACGACCACTGGCGGACCTACTGCTCGGAG  
ACGTGCTACTGGACCGACGCGGTTCGCCTTCGCGGTGAGTACGAGGGCCCGGC  
CCACGCCGAACATGGGCCGCTCTACCGGTTTCGGGAATGGGAGACCCTGCA  
CCACGACAAGGATCTCGCCGACATCGTGCAGGACCTCGGGTATGTGCGCGAC  
GACGGCAAGACCCTCGTCGGCCAGCCGCACCTCGATCTCGACCCGAAGAAG  
ATGTGGACCCCTCGACGACGTGCGGGGCAACACCTTCCAGAGCCCGAACGTCC  
TGCTGAACCAGATGACGGACGAGGAGCGCGCAGCGCACATCGCGGAGTACC  
GCGCCGGCGCCACGCCGCTCTGA  
CGAGTTGGGTCATAAGAAGGACGACCTCGAACGGTGGCTGTCGAAGATCACC  
CTGGCCCAGACCGGCTACGGCCACTTCTACATCGAACACAACCGCGGCCACC  
ACGTGCGGGTCTCCACCCCGGAGGACCCGGCCTCGGCCCGTTTCGGCGAATC  
GTTCTGGGCGTTCCTGCCGCGCAGCGTGTGGGGCAGCCTGAAGTCGTCTGG  
GAGCTCGAGAAGACCCGCCTGCAGCGACTCGGCAAGAGCCCGTGGACCCCTG  
CGCAACGACGTCTCAACCGGTGGGCGATGTCGGTGGTCTGTTTCGGCGTGCT  
CGTCGCGGTGTTTCGGCCCGGTTCATCGTTCCGTTCTGATCCTGCAGGCCGTCT  
ACGGTTTCTCCCTGCTCGAGACGGTGAACACTCGAGCACTACGGACTGCTG  
CGGCAGAAGACGGCCTCGGGCCGGTACGAGCGCTGCACCCCGCGCACAGC  
TGGAATTCCGACCACATCGTCACCAACATCTTCTGTACCACCTGCAGCGACA  
C

*Rhodococcus*  
*ruber*  
NBRC15591\_a BAV60970.1  
lkane  
hydroxylase
